# Supplementary material for: Immune overdrive signature in colorectal tumor subset predicts poor clinical outcome
Source: JCI journal article supplement (doi:10.1172/jci127046), 2019-09-15
Supplement: sd1 [file 1]

## Supplemental Materials

**Fakih M. et al.** Immune overdrive signature in colorectal tumor subset predicts poor clinical outcome

### **Supplemental Tables**

**Supplemental Table S1.** Survival and associations with clinicopathologic characteristics using Cox regression.

**Supplemental Table S2.** Microsatellite instability status across *CD8A/CD274* -stratified risk groups (TCGA Stage IV).

**Supplemental Table S3.** Patient characteristics of public data sets.

### **Supplemental Figures and Legends**

**Supplemental Figure S1.** Log-rank statistics for the determination of the optimal cut-point for patient stratification based on *CD8A* gene expression.

**Supplemental Figure S2.** Log-rank statistics for the determination of the optimal cut-point for patient stratification based on *CD274* gene expression.

**Supplemental Figure S3.** Investigation of clinical outcome for the population having high *CD8A* and intensive *CD274* expression in TCGA melanoma data set.

**Supplemental Figure S4.** Relapse-free survival analysis of the CRC risk subpopulation using NCBI-GEO data set.

**Supplemental Figure S5.** The protein expression of PDCD1 (PD-1) and CD274 (PD-L1) in the tumor microenvironment (City of Hope cohort).

**Supplemental Figure S6.** Expression levels of genes encoding commonly used cell type-specific markers across the CRC overall survival risk groups in TCGA and NCBI-GEO GSE39582 stage II and III samples.

**Supplemental Figure S7.** The gene expression of *PDCD1* (PD-1) and *CD274* (PD-L1) in the tumor microenvironment (public data sets).

**Supplemental Figure S8.** The expression of *CD274* (PD-L1) regulatory genes across the CRC risk groups.

**Supplemental Figure S9.** Correlation among the expression of pro-inflammatory and immune regulatory genes in human melanoma and CRC in TCGA data set, along with the expression pattern of immune genes across the CRC risk groups.

**Supplemental Figure S10.** Estimation of the immune cell infiltration across the *CD8A* and *CD274* (PD-L1) expression-stratified CRC risk groups using two tumor deconvolution methods TIMER and CIBERSORT with TCGA gene expression data.

**Supplemental Figure S11.** The expression of representative immune checkpoint genes across the CRC risk groups.

**Supplemental Figure S12.** Expression of TGF $\beta$ -encoding and C-ECM signature genes and the distribution of consensus molecular subtypes (CMS) across the CRC risk groups in NCBI-GEO GSE39582 data set.

**Supplemental Figure S13.** Multispectral fluorescent IHC staining of the protein products of DNA mismatch-repair genes.

**Supplemental Figure S14.** Inference of microsatellite instability using microarray gene expression profiles in a NCBI-GEO data meta-analysis for stage II and III samples.

### Supplemental Table S1:

Survival and associations with clinicopathologic characteristics using Cox regression.

| Clinicopathologic variable | TCGA <sup>A</sup><br>(N=391)              |       |             | NCBI-GEO GSE39582 <sup>A</sup><br>(N=461) |       |             | NCBI-GEO Meta-analysis <sup>A,B</sup><br>(N=828) |       |             |         |
|----------------------------|-------------------------------------------|-------|-------------|-------------------------------------------|-------|-------------|--------------------------------------------------|-------|-------------|---------|
|                            | <i>Overall Survival</i>                   |       |             | <i>Overall Survival</i>                   |       |             | <i>Relapse-free Survival</i>                     |       |             |         |
|                            | HR                                        | 95%CI | p-value     | HR                                        | 95%CI | p-value     | HR                                               | 95%CI | p-value     |         |
| Age                        | Continuous                                | 1.04  | (1.02~1.06) | < 0.001                                   | 1.04  | (1.02~1.05) | < 0.001                                          | 1.00  | (0.99~1.01) | 0.932   |
|                            | ≥65 vs. <65                               | 2.35  | (1.33~4.17) | 0.0033                                    | 1.81  | (1.24~2.64) | 0.0021                                           | 0.85  | (0.65~1.10) | 0.222   |
| Stage                      | III vs. II                                | 1.96  | (1.22~3.15) | 0.0056                                    | 1.21  | (0.87~1.69) | 0.261                                            | 2.08  | (1.59~2.71) | < 0.001 |
| Gender                     | Male vs. Female                           | 1.00  | (0.62~1.59) | 0.989                                     | 1.30  | (0.92~1.82) | 0.136                                            | 1.25  | (0.96~1.63) | 0.091   |
| CD8A expression            | Continuous                                | 1.00  | (0.87~1.16) | 0.985                                     | 1.03  | (0.86~1.23) | 0.756                                            | 0.97  | (0.83~1.14) | 0.713   |
|                            | Categorical (High vs. Low) <sup>C</sup>   | 0.82  | (0.51~1.32) | 0.417                                     | 0.87  | (0.63~1.22) | 0.424                                            | 0.90  | (0.70~1.17) | 0.436   |
| CD274 (PD-L1) expression   | Continuous                                | 1.00  | (0.85~1.17) | 0.995                                     | 1.59  | (0.99~2.56) | 0.054                                            | 1.23  | (0.89~1.70) | 0.217   |
|                            | Categorical (High* vs. Low*) <sup>D</sup> | 1.83  | (1.04~3.20) | 0.035                                     | 1.98  | (1.19~3.29) | 0.0085                                           | 1.53  | (1.07~2.19) | 0.021   |
| Risk Group <sup>E</sup>    | Group IV* vs. Group III*                  | 2.83  | (1.40~5.74) | 0.0038                                    | 2.37  | (1.33~4.20) | 0.0033                                           | 1.67  | (1.09~2.57) | 0.019   |
|                            | Group I+II vs. Group III*                 | 1.82  | (1.00~3.31) | 0.048                                     | 1.31  | (0.92~1.87) | 0.134                                            | 1.24  | (0.93~1.64) | 0.141   |
| Microsatellite instability | MSS vs. MSI                               | 0.82  | (0.46~1.47) | 0.507                                     | 0.96  | (0.62~1.49) | 0.845                                            | 1.03  | (0.73~1.45) | 0.876   |

<sup>A</sup> Analysis based on stage II and III patients.

<sup>B</sup> Including GSE39582, GSE14333, GSE17538, GSE31595.

<sup>C</sup> Dichotomized using median value of CD8A expression.

<sup>D</sup> Dichotomized using optimal CD274 cut-point based on Log-rank test statistics (denoted with an asterisk for the cut-point determined in CD8A high group).

<sup>E</sup> Group I+II: CD8A low expression; Group III\*: CD8A high / CD274 low\* expression; Group IV\*: CD8A high / CD274 high\* expression.

**Supplemental Table S2:**Microsatellite instability status across *CD8A/CD274*-stratified risk groups (TCGA Stage IV).

| <b>Cohort</b>                                  | <b>Risk Group</b>                                            | <b>MSI</b> | <b>MSS</b> | <b>Total</b>          | <b>% MSI</b> |
|------------------------------------------------|--------------------------------------------------------------|------------|------------|-----------------------|--------------|
| <b>TCGA</b> <sup>A,B</sup><br>(Stage IV; N=85) | <b>Group I+II</b><br>( <i>CD8A</i> low)                      | 1          | 55         | 56                    | 1.8%         |
|                                                | <b>Group III*</b><br>( <i>CD8A</i> high / <i>CD274</i> low*) | 0          | 20         | 20                    | 0.0%         |
|                                                | <b>Group IV*</b><br>( <i>CD8A</i> high / <i>CD274</i> high*) | 2          | 7          | 9<br>(10.6% of total) | 22.2%        |

<sup>A</sup> Based on overall survival analysis.<sup>B</sup> Data based on primary tumors.

**Supplemental Table S3: Patient characteristics of public data sets.**

| <b>TCGA</b>                             |                                     |         |                              |         |                                      |         |
|-----------------------------------------|-------------------------------------|---------|------------------------------|---------|--------------------------------------|---------|
| Characteristic                          | Number (%) of Patients <sup>A</sup> |         |                              |         |                                      |         |
|                                         | Stage II Disease<br>(n=217)         |         | Stage III Disease<br>(n=174) |         | All Patients <sup>B</sup><br>(n=599) |         |
| Age at diagnosis (year)                 |                                     |         |                              |         |                                      |         |
| Median age (range)                      | 68                                  | (31~90) | 64                           | (31~90) | 66                                   | (31~90) |
| Cancer type                             |                                     |         |                              |         |                                      |         |
| Colon adenocarcinoma                    | 169                                 | 77.9%   | 126                          | 72.4%   | 440                                  | 73.5%   |
| Rectum adenocarcinoma                   | 48                                  | 22.1%   | 48                           | 27.6%   | 159                                  | 26.5%   |
| Gender                                  |                                     |         |                              |         |                                      |         |
| Male                                    | 119                                 | 54.8%   | 85                           | 48.9%   | 323                                  | 53.9%   |
| Female                                  | 98                                  | 45.2%   | 89                           | 51.1%   | 276                                  | 46.1%   |
| Pathologic T                            |                                     |         |                              |         |                                      |         |
| Tis                                     | 0                                   | 0       | 0                            | 0       | 1                                    | 0.2%    |
| T1                                      | 0                                   | 0       | 2                            | 1.2%    | 20                                   | 3.4%    |
| T2                                      | 1                                   | 0.5%    | 13                           | 7.5%    | 105                                  | 17.7%   |
| T3                                      | 201                                 | 93.9%   | 137                          | 79.2%   | 404                                  | 68.2%   |
| T4                                      | 12                                  | 5.6%    | 21                           | 12.1%   | 62                                   | 10.5%   |
| Pathologic N                            |                                     |         |                              |         |                                      |         |
| N0                                      | 214                                 | 100.0%  | 0                            | 0.0%    | 335                                  | 56.6%   |
| N1                                      | 0                                   | 0       | 108                          | 62.4%   | 146                                  | 24.7%   |
| N2                                      | 0                                   | 0       | 64                           | 37.0%   | 108                                  | 18.2%   |
| NX                                      | 0                                   | 0       | 1                            | 0.6%    | 3                                    | 0.5%    |
| Pathologic M <sup>C</sup>               |                                     |         |                              |         |                                      |         |
| M0                                      | 198                                 | 100.0%  | 142                          | 100.0%  | 440                                  | 84.3%   |
| M1                                      | 0                                   | 0       | 0                            | 0       | 70                                   | 13.4%   |
| M1a                                     | 0                                   | 0       | 0                            | 0       | 10                                   | 1.9%    |
| M1b                                     | 0                                   | 0       | 0                            | 0       | 2                                    | 0.4%    |
| Microsatellite instability <sup>D</sup> |                                     |         |                              |         |                                      |         |
| MSI (MSI-H)                             | 47                                  | 22.1%   | 16                           | 9.2%    | 83                                   | 13.9%   |
| MSS (MSI-L and MSS)                     | 166                                 | 77.9%   | 158                          | 90.8%   | 512                                  | 86.1%   |

  

| <b>NCBI-GEO GSE39582</b>                |                                     |         |                              |         |                                      |         |
|-----------------------------------------|-------------------------------------|---------|------------------------------|---------|--------------------------------------|---------|
| Characteristic                          | Number (%) of Patients <sup>A</sup> |         |                              |         |                                      |         |
|                                         | Stage II Disease<br>(n=260)         |         | Stage III Disease<br>(n=201) |         | All Patients <sup>B</sup><br>(n=557) |         |
| Age at diagnosis (year)                 |                                     |         |                              |         |                                      |         |
| Median age (range)                      | 68                                  | (24~94) | 67                           | (22~97) | 67                                   | (22~97) |
| Gender                                  |                                     |         |                              |         |                                      |         |
| Male                                    | 153                                 | 58.8%   | 105                          | 52.2%   | 443                                  | 53.5%   |
| Female                                  | 107                                 | 41.2%   | 96                           | 47.8%   | 385                                  | 46.5%   |
| Microsatellite instability <sup>E</sup> |                                     |         |                              |         |                                      |         |
| MSI                                     | 54                                  | 20.8%   | 30                           | 14.9%   | ND                                   | ND      |
| MSS                                     | 206                                 | 79.2%   | 171                          | 85.1%   | ND                                   | ND      |

  

| <b>NCBI-GEO Meta-analysis (Stage II and III)</b> |                                     |         |                              |         |                         |         |
|--------------------------------------------------|-------------------------------------|---------|------------------------------|---------|-------------------------|---------|
| Characteristic                                   | Number (%) of Patients <sup>A</sup> |         |                              |         |                         |         |
|                                                  | Stage II Disease<br>(n=444)         |         | Stage III Disease<br>(n=384) |         | All Patients<br>(n=828) |         |
| Age at diagnosis (year)                          |                                     |         |                              |         |                         |         |
| Median age (range)                               | 68                                  | (24~94) | 66                           | (22~97) | 67                      | (22~97) |
| Gender                                           |                                     |         |                              |         |                         |         |
| Male                                             | 245                                 | 55.2%   | 198                          | 51.6%   | 443                     | 53.5%   |
| Female                                           | 199                                 | 44.8%   | 186                          | 48.4%   | 385                     | 46.5%   |
| Microsatellite instability <sup>E</sup>          |                                     |         |                              |         |                         |         |
| MSI                                              | 95                                  | 21.4%   | 66                           | 17.2%   | 161                     | 19.4%   |
| MSS                                              | 349                                 | 78.6%   | 318                          | 82.8%   | 667                     | 80.6%   |

<sup>A</sup> All percentages were based on weighted analysis.

<sup>B</sup> Including Stage I, Stage IV and stage-unknown patients.

<sup>C</sup> 77 patients have either MX status or no information.

<sup>D</sup> 4 patients have no microsatellite instability information.

<sup>E</sup> Inferred by clustering analysis.

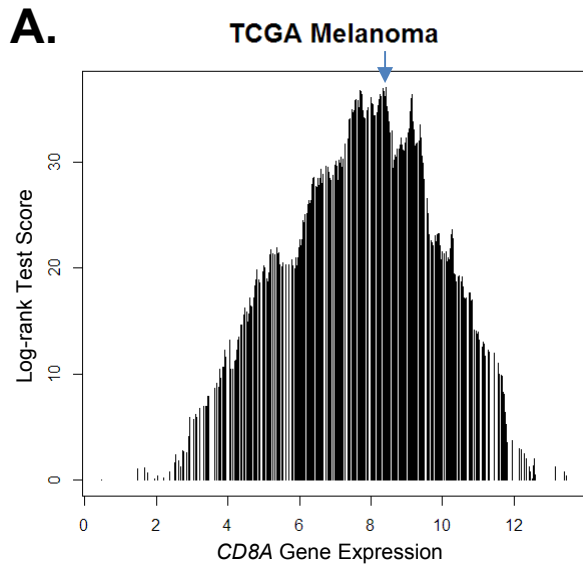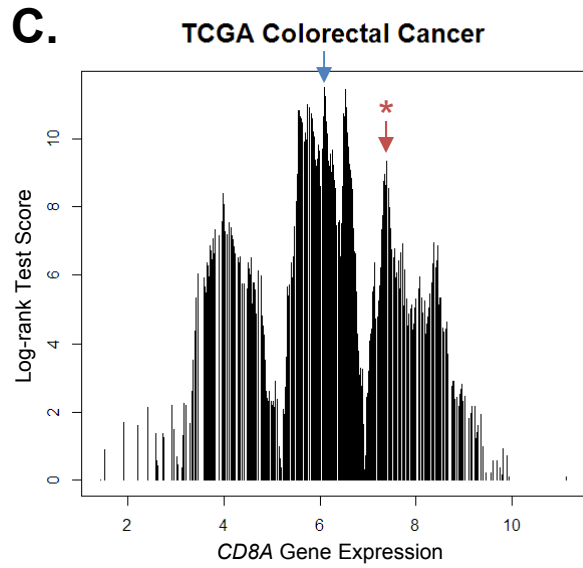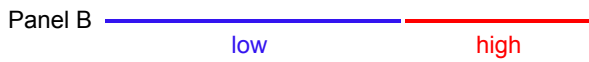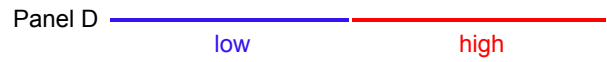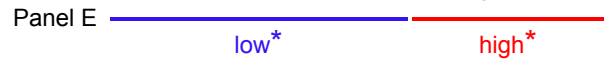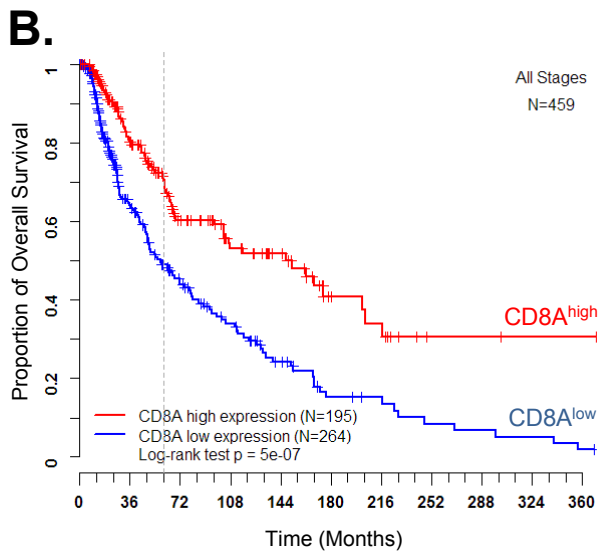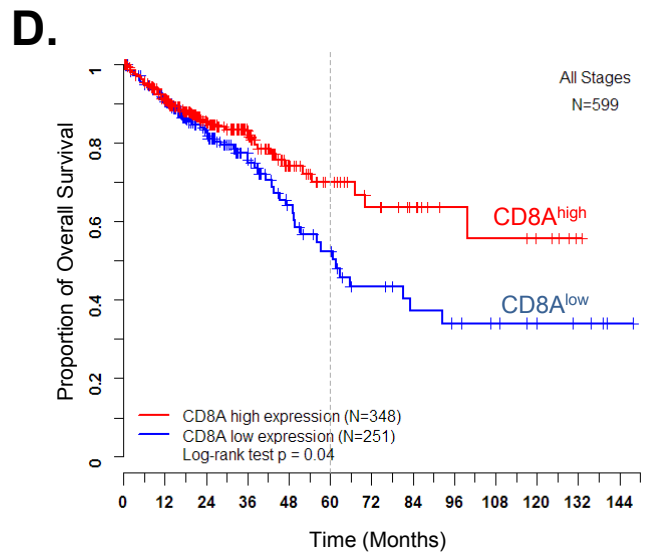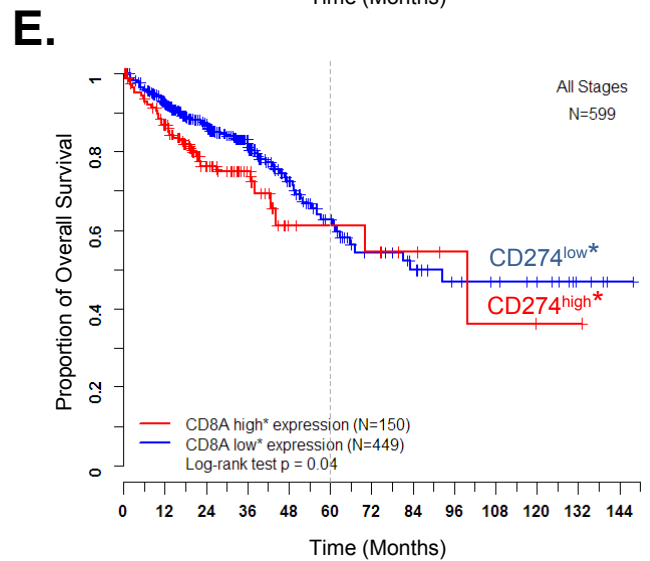

**Supplemental Figure S1.** Log-rank statistics for the determination of the optimal cut-point for patient stratification based on *CD8A* gene expression.

Log-rank statistics were applied to identify the optimal cut-point for transforming the continuous variable of *CD8A* gene expression into categorical high and low expression groups in a survfit model. The test score at each candidate cut-point across the log-transformed gene expression values was plotted in panel (A) and (C) for TCGA melanoma and CRC data sets, respectively. For melanoma data set, the *CD8A* expression value showing the highest test score (indicated with a blue arrow) was applied for dichotomizing the patients. The Kaplan-Meier survival curves for the two patient groups were plotted using blue (low expression) and red (high expression) colors in panel (B). Grey dashed line was employed for visualizing the survival rates at 5-year mark. Log-rank test *p*-value was shown in the bottom left legend. For CRC data set, a more complicated score distribution was observed. Multiple cut-points along the distribution were tested for dichotomizing the patients for survival analysis. As shown in panel (D) and (E), Kaplan-Meier survival curves for low and high *CD8A* expression groups dichotomized by cut-points indicated with blue and red arrows showed a reverse pattern of survival trends, suggesting the existence of a novel risk group which is absent in melanoma.

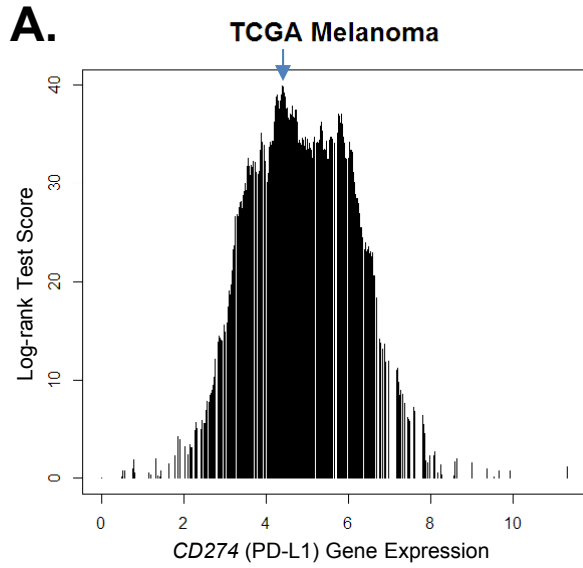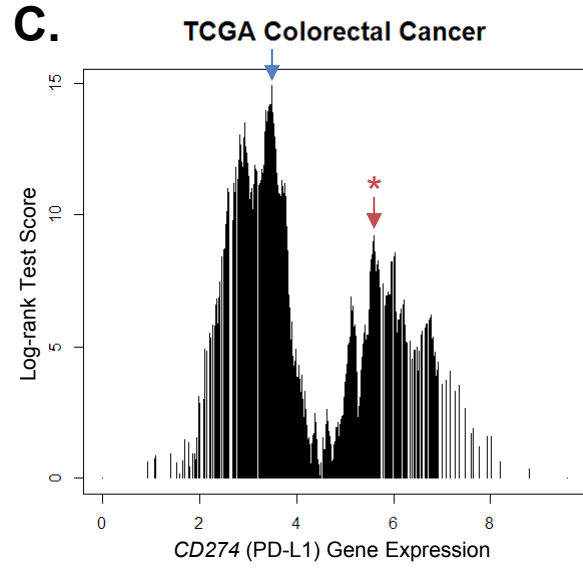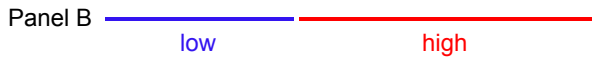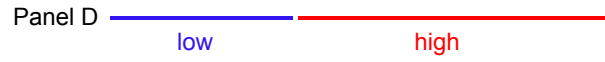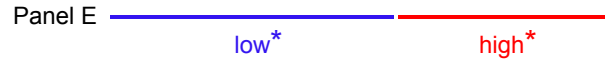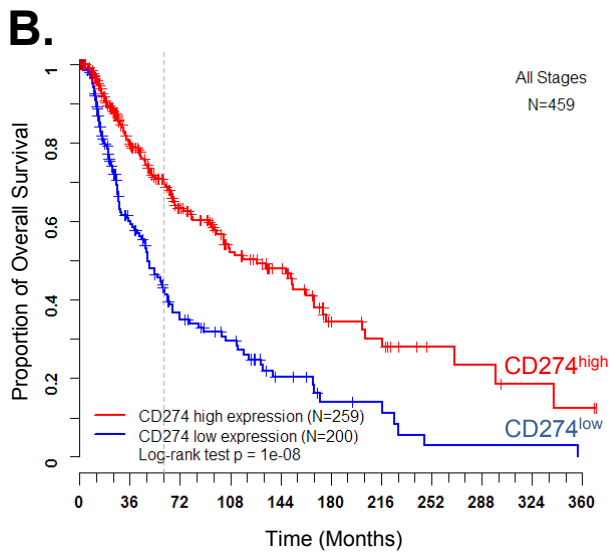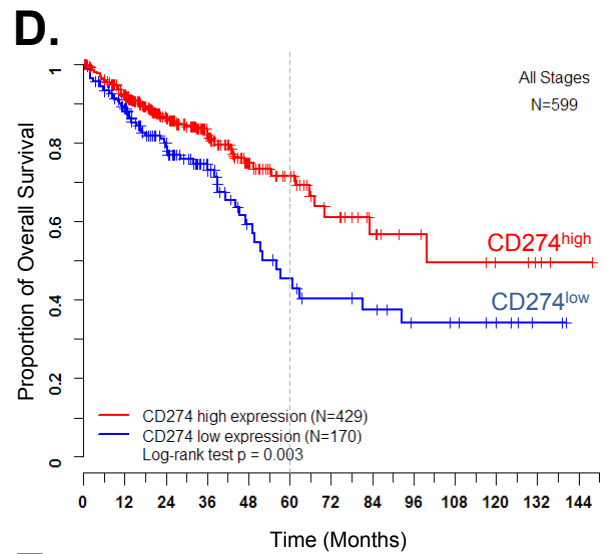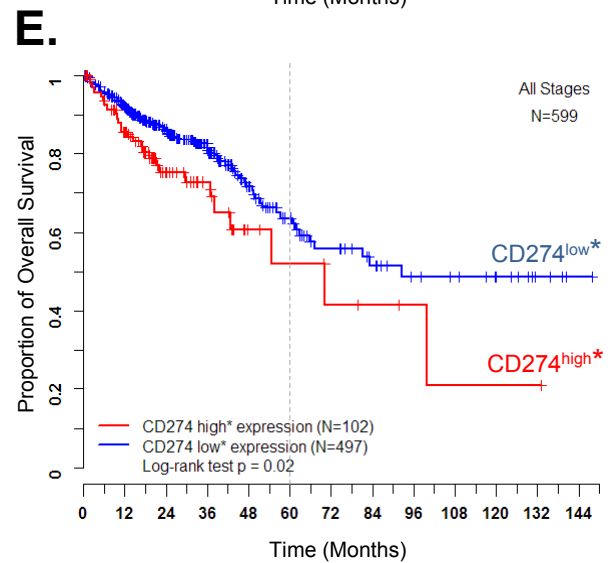



**Supplemental Figure S2.** Log-rank statistics for the determination of the optimal cut-point for patient stratification based on *CD274* gene expression.

Following the convention in Supplemental Figure S1 except for *CD274*, instead of *CD8A*, gene expression.

**A.**

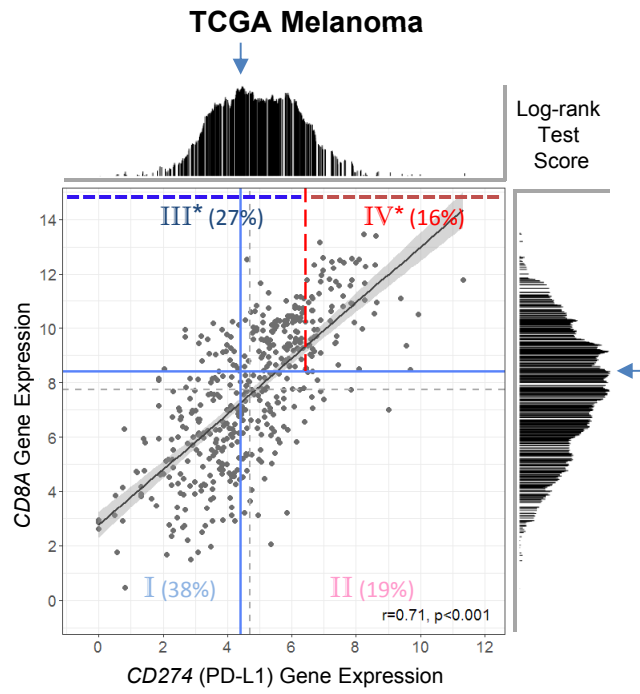

**B.**

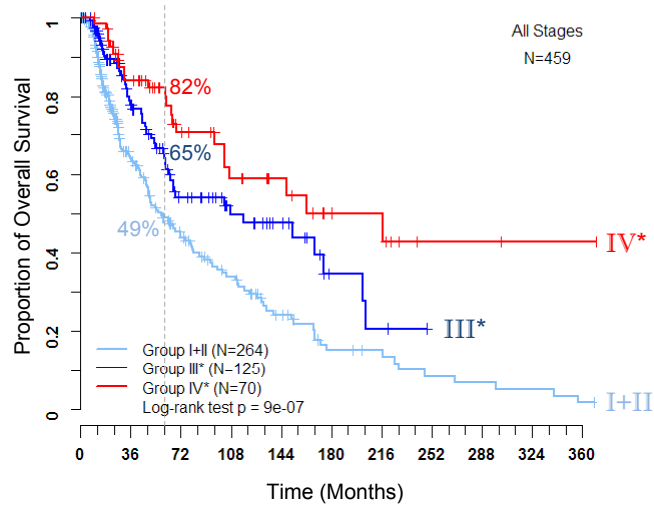

**Supplemental Figure S3.** Investigation of clinical outcome for the population having high *CD8A* and intensive *CD274* expression in TCGA melanoma data set.

(A) Adopted from Figure 1A, a virtual risk Group IV\* applying the same CRC cut-point (based on *CD274* percentile) was isolated from the rest of *CD8A* high expression population in melanoma. (B) Kaplan-Meier survival curves are compared for the risk groups.

**A.****NCBI-GEO GSE39582***Relapse-free Survival*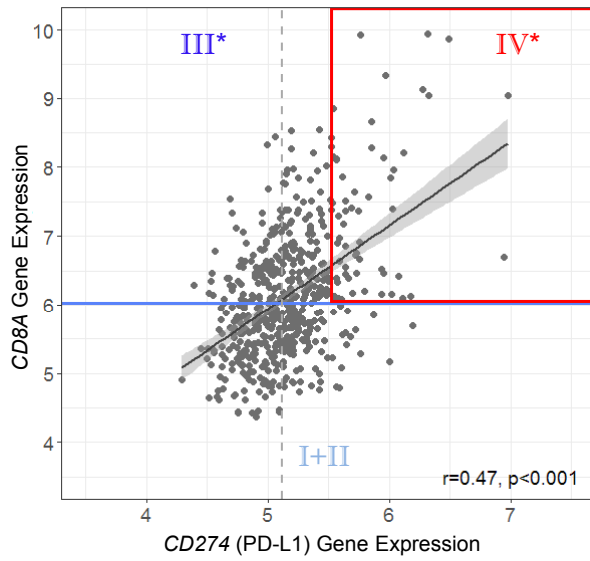**C.****NCBI-GEO Meta-analysis***Relapse-free Survival*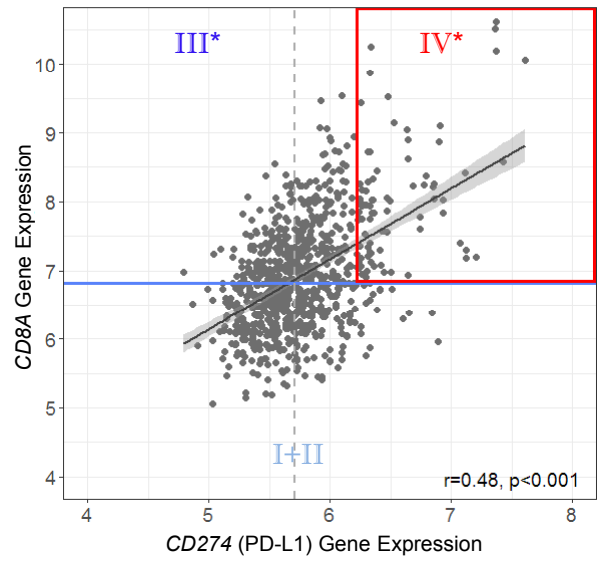**B.**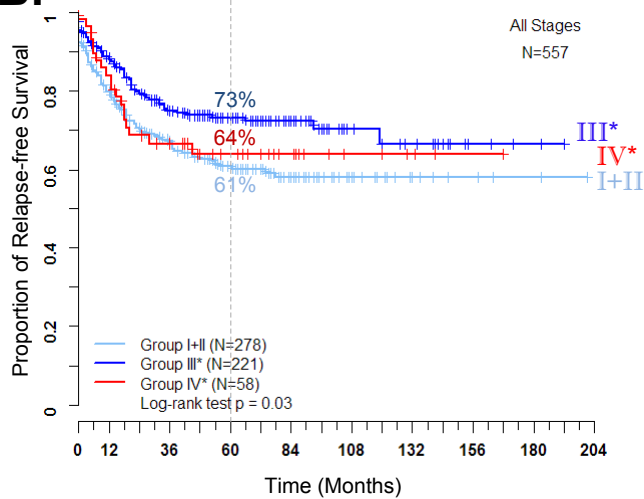**D.**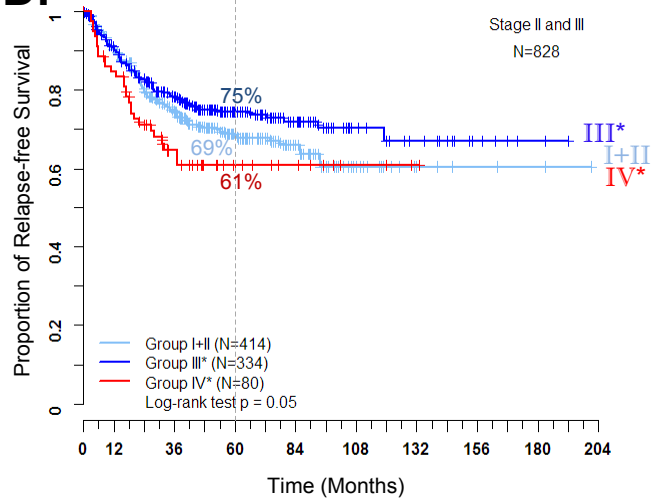

**Supplemental Figure S4.** Relapse-free survival analysis of the CRC risk subpopulation using NCBI-GEO data set.

Scatter plots of  $\log_2$ -transformed *CD8A* and *CD274* gene expression values are shown for NCBI-GEO GSE39582 data set (A) and a NCBI-GEO meta-analysis (C), with risk groups indicated (Group I+II as *CD8A*<sup>low</sup>, III\* and IV\* as *CD8A*<sup>high</sup> dichotomized by *CD274* expression). For relapse-free survival analysis, Kaplan-Meier survival curves for the three risk groups are compared for NCBI-GEO GSE39582 stage I to IV samples (B) (N=557) and stage II and III samples from a NCBI-GEO meta-analysis (D) (N=828). Log-rank test *p*-values are shown for each plot.

**A.**

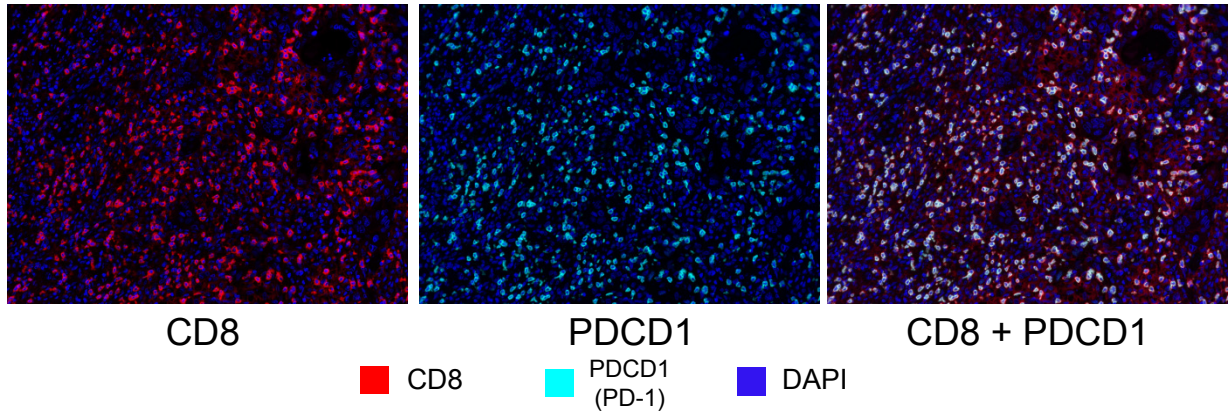

**B.**

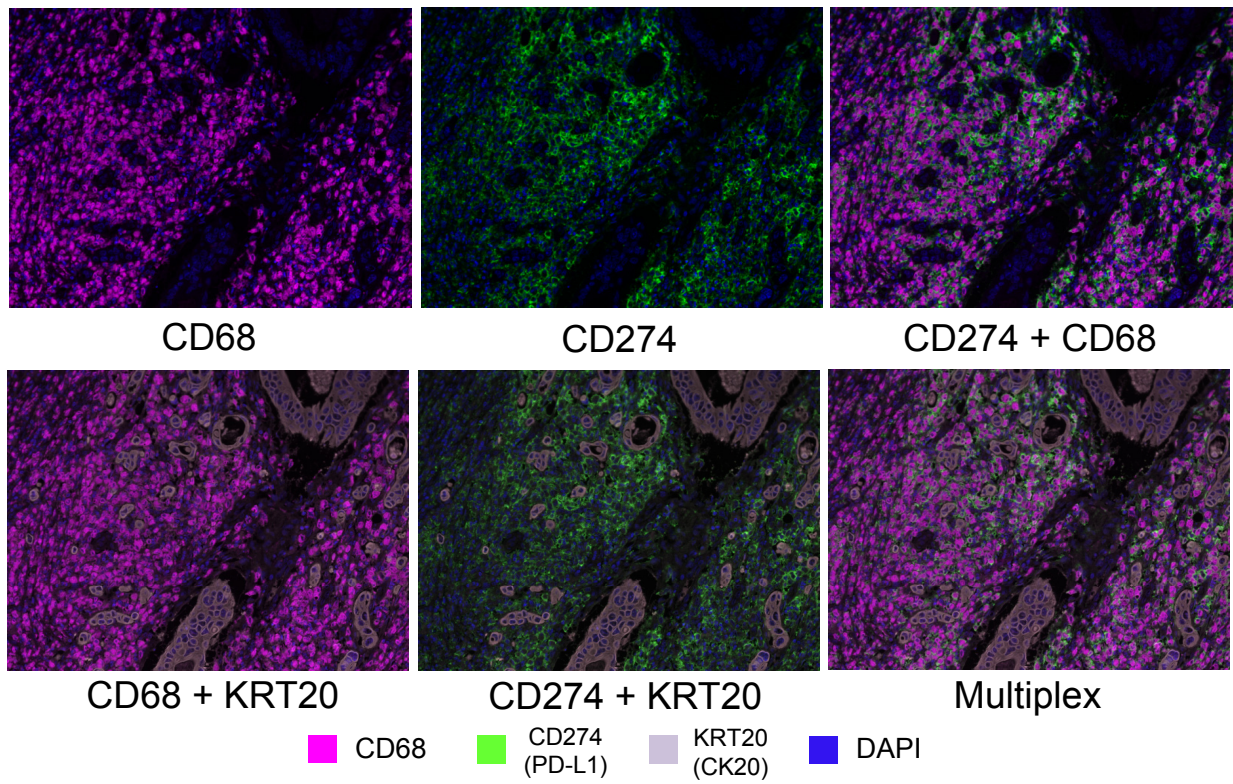



C.

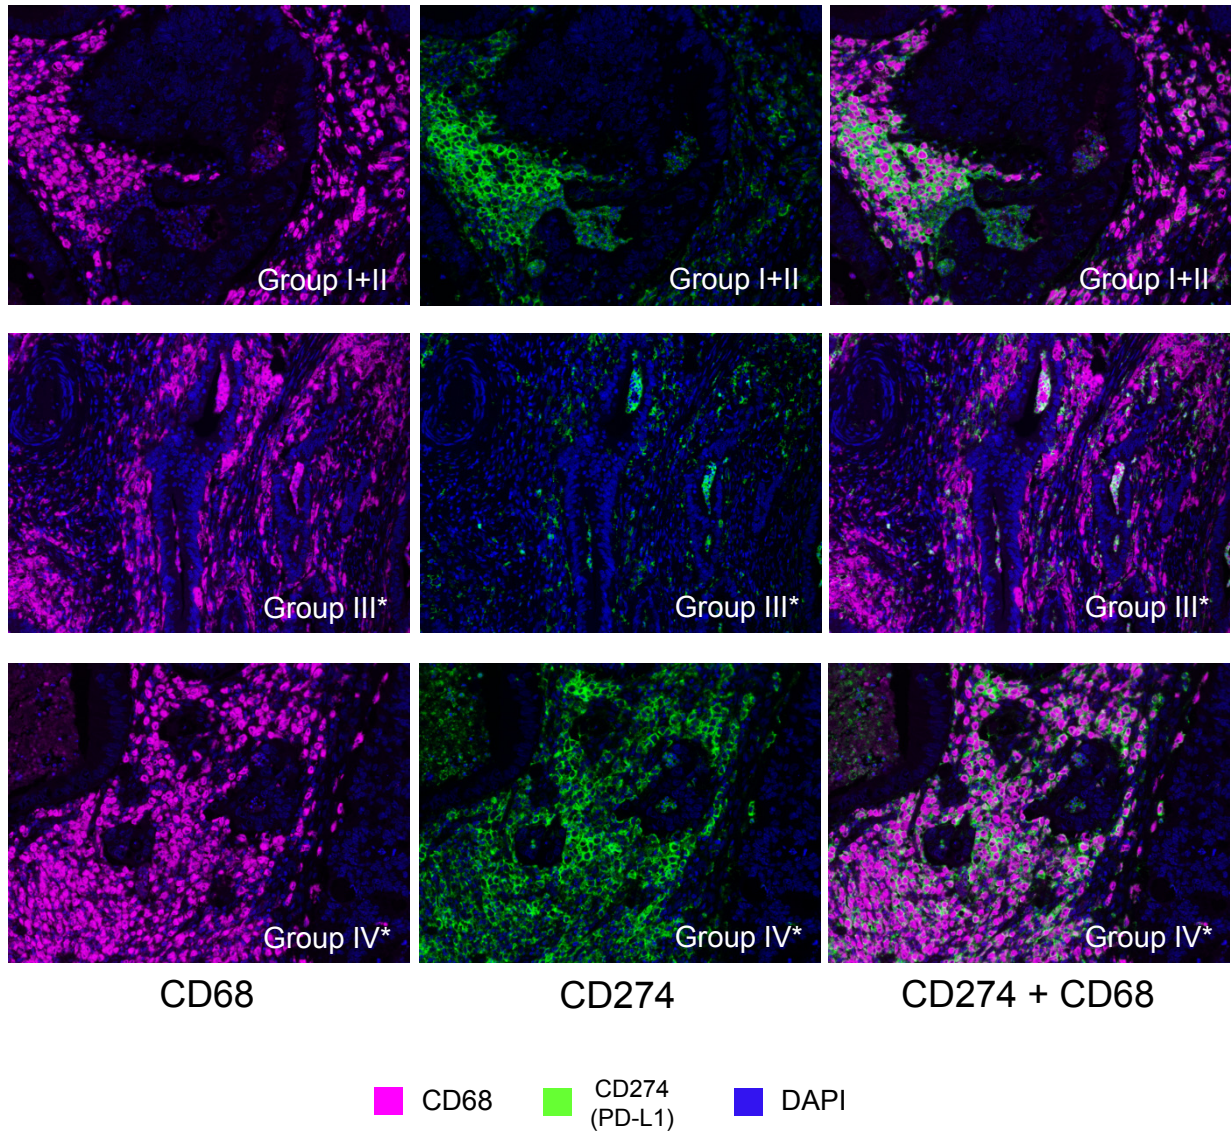

**Supplemental Figure S5.** The protein expression of PDCD1 (PD-1) and CD274 (PD-L1) in the tumor microenvironment (City of Hope cohort).

Two panels of multispectral fluorescent biomarkers were developed for IHC staining. The first panel, including CD8, CD274, PDCD1, KRT20, and DAPI, was employed to observe (A) the co-localization of CD8 and PDCD1 (PD-1). Representative multiplex image was shown in Figure 4A. The second panel, including CD68, CD274, CK20, and DAPI, was applied to observe (B) the CD274 (PD-L1) expression on KRT20- (CK20-) non-tumor cells and the expression of CD274 (PD-L1) on CD68+ tumor associated macrophages. Representative images from different risk groups are shown in (C). Color combination: CD8 (red), PDCD1 (PD-1) (cyan), CD274 (PD-L1) (green), KRT20 (CK20) (lavender), CD68 (magenta), DAPI (blue).



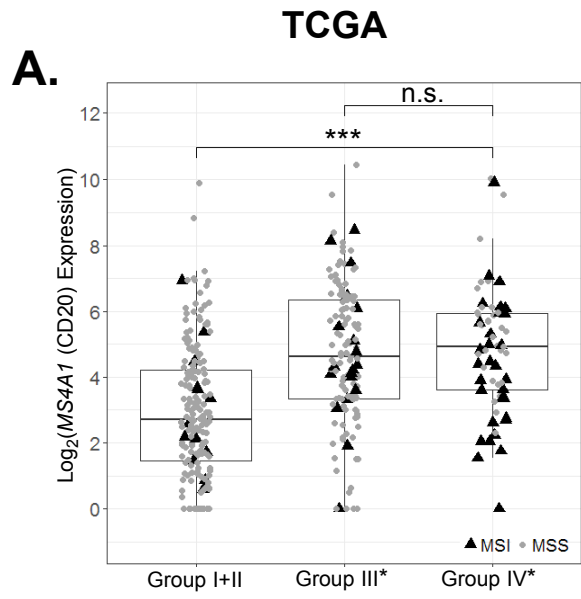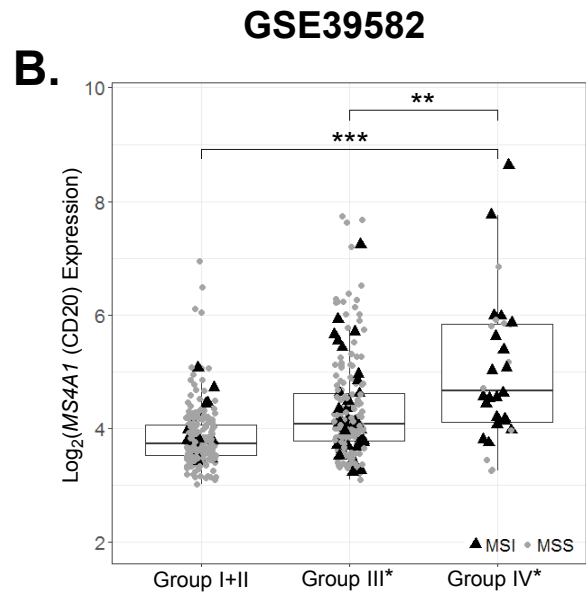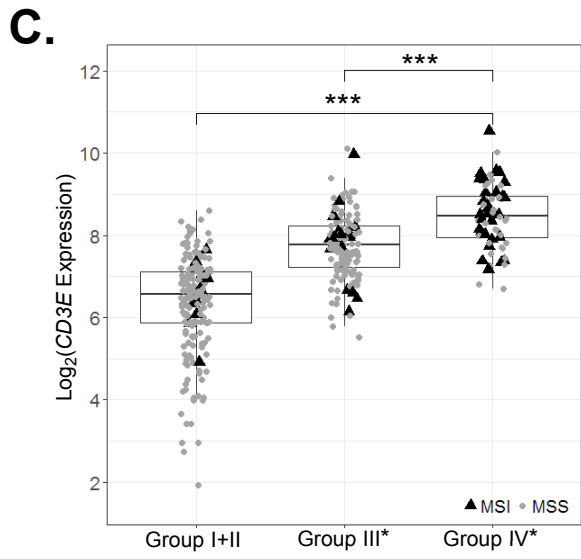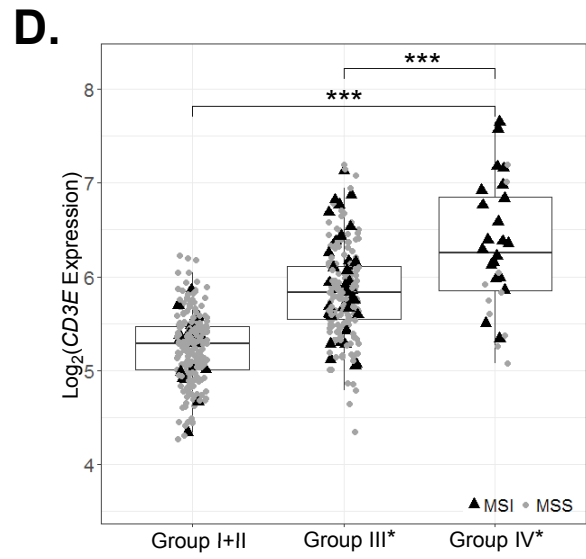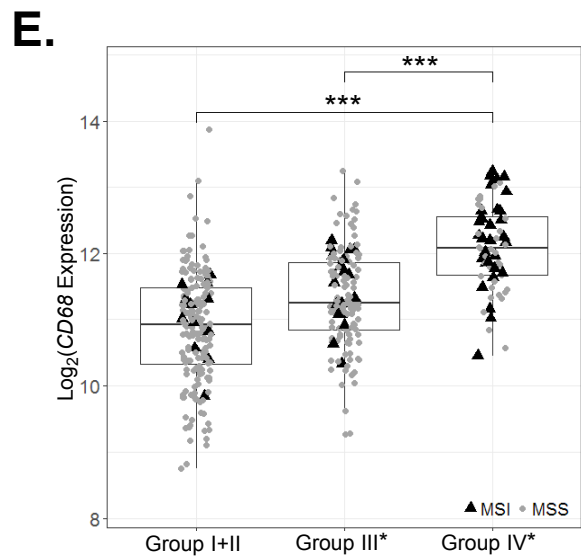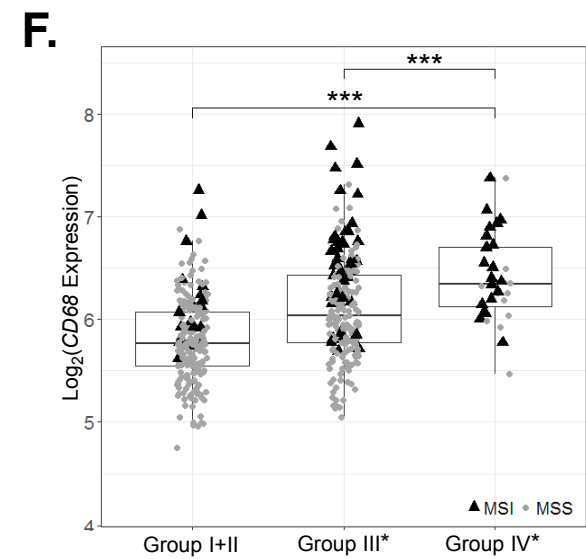

Supplemental Figure S6 A-F

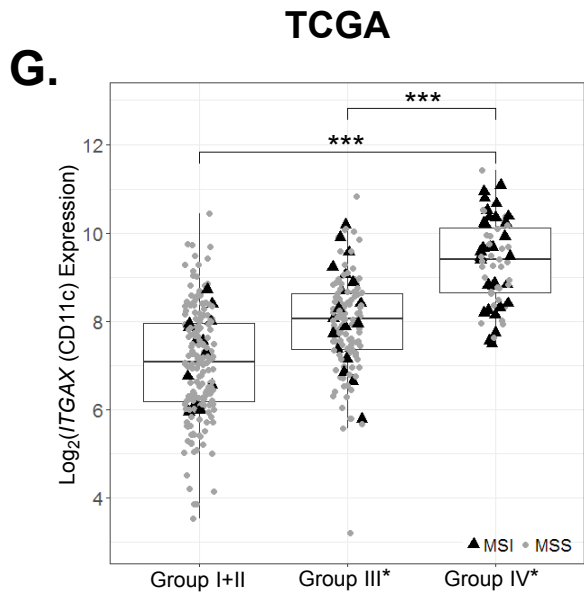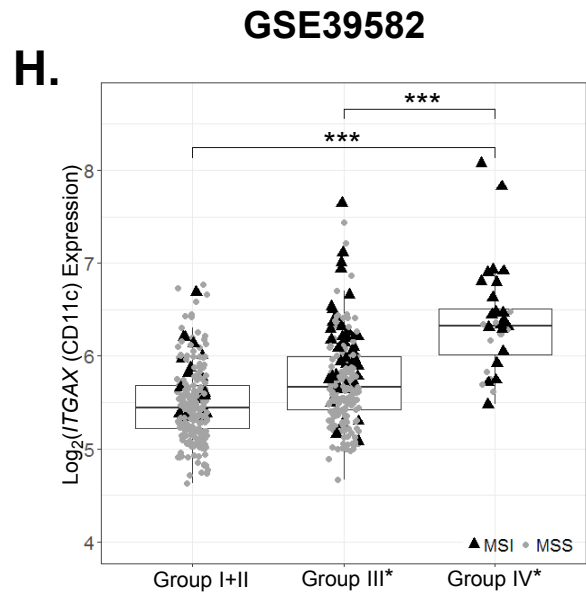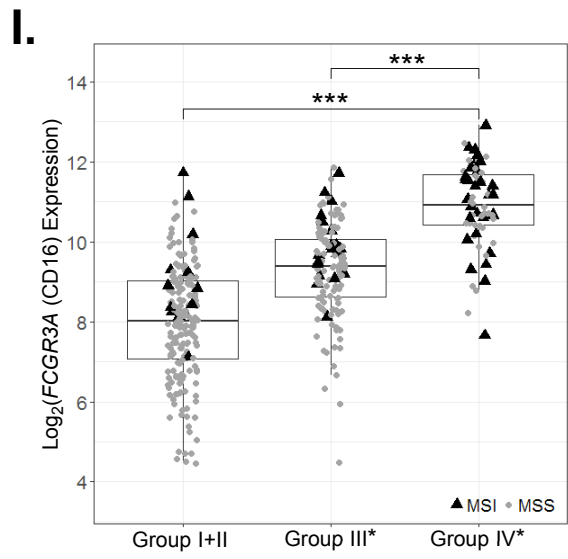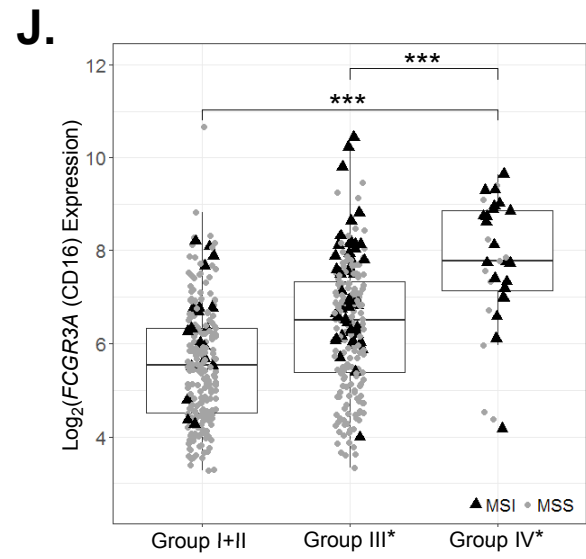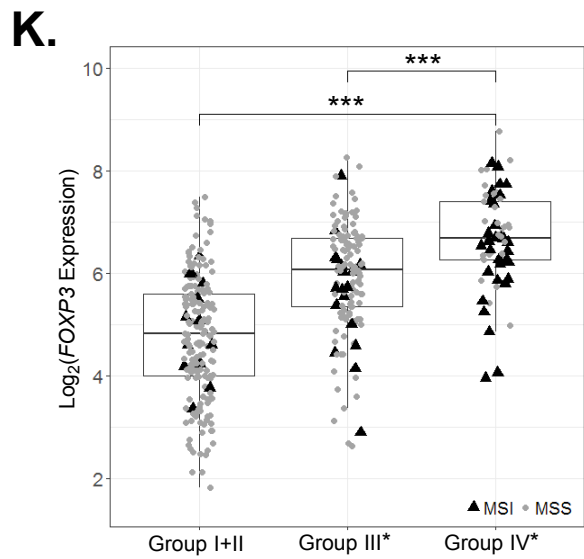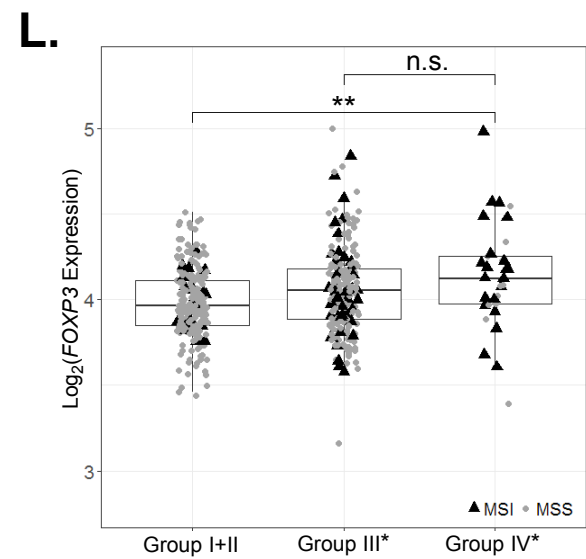

Supplemental Figure S6 G-L

**Supplemental Figure S6.** Expression levels of genes encoding commonly used cell type-specific markers across the CRC overall survival risk groups in TCGA (left panels; N=391) and NCBI-GEO GSE39582 (right panels; N=461) stage II and III samples. Standard boxplots are applied to visualize gene expression levels across the three risk groups following the convention in Figure 5. Representative genes expressed in major immune cell types: *MS4A1* (CD20) for B cells (A and B), *CD3E* for T cells (C and D), *CD68* for macrophages (E and F), *ITGAX* (CD11c) for dendritic cells (G and H), *FCGR3A* (CD16) for neutrophils (I and J), *FOXP3* for regulatory T cells (K and L). Statistical *p*-values between groups were determined by Welch's *t*-tests after Bonferroni correction for multiple comparisons: \*\*\**p*<0.001, \*\**p*<0.01, \**p*<0.05, n.s.: not significant.

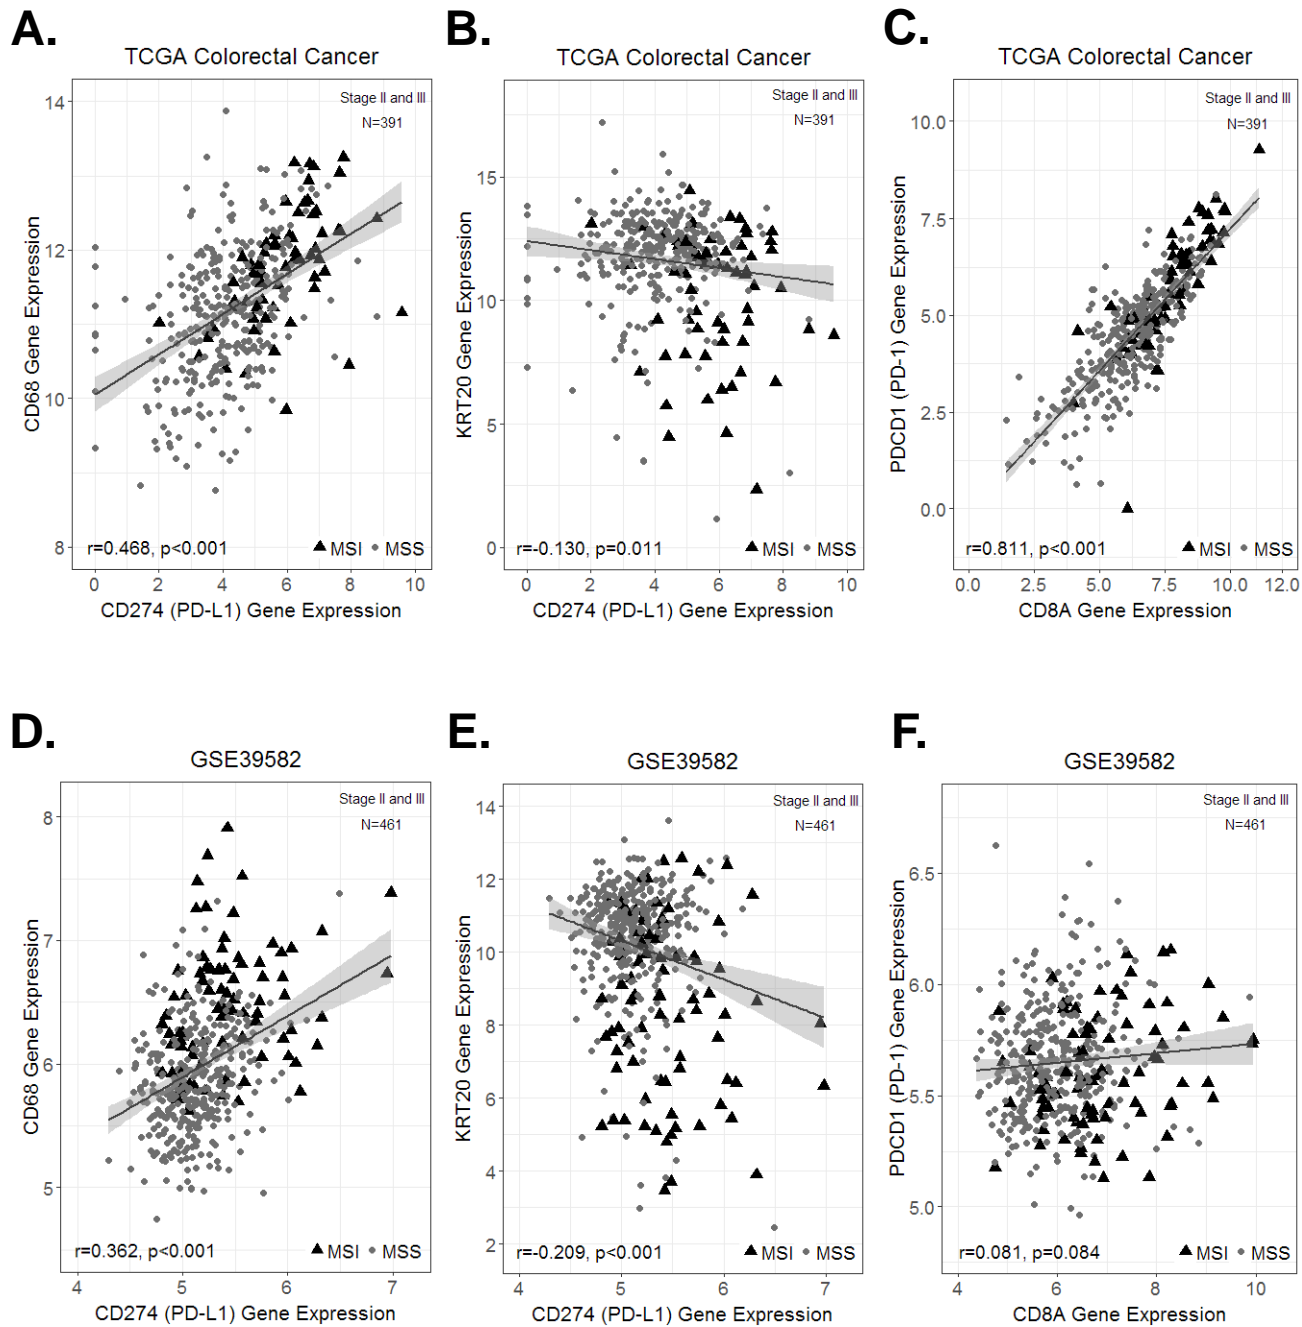

Supplemental Figure S7

**Supplemental Figure S7.** The gene expression of *PDCD1* (PD-1) and *CD274* (PD-L1) in the tumor microenvironment (public data sets).

Scatter plots for the expression of *CD274* vs. *CD68* (A and D), *CD274* vs. *KRT20* (B and E) and *PDCD1* vs. *CD8A* (C and F). Panel A to C applied normalized RNA-Seq data of stage II or III patients from TCGA data set. Panel D to F applied normalized microarray expression data from NCBI-GEO GSE39582 data set. Each dot represents the gene expression data for an individual. MSI (black triangles) and MSS (grey circles) statuses are labeled. A regression line was plotted based on the linear model with the grey shaded region showing the 95% confidence interval. The linear regression  $p$ -values and the Pearson correlation coefficient  $r$  were given at the bottom of the plots.

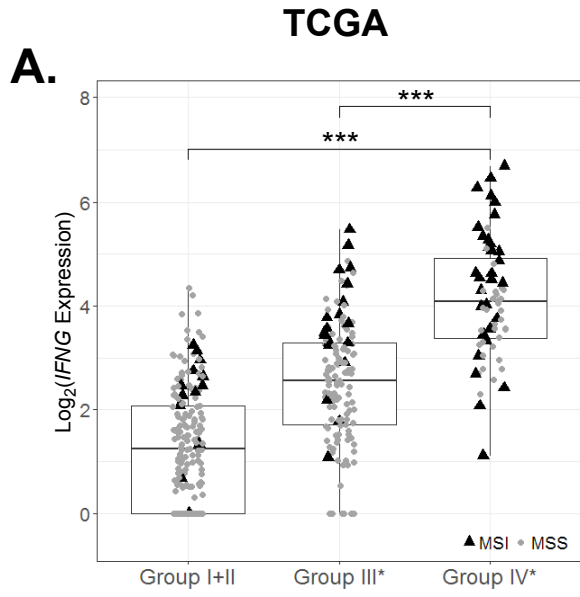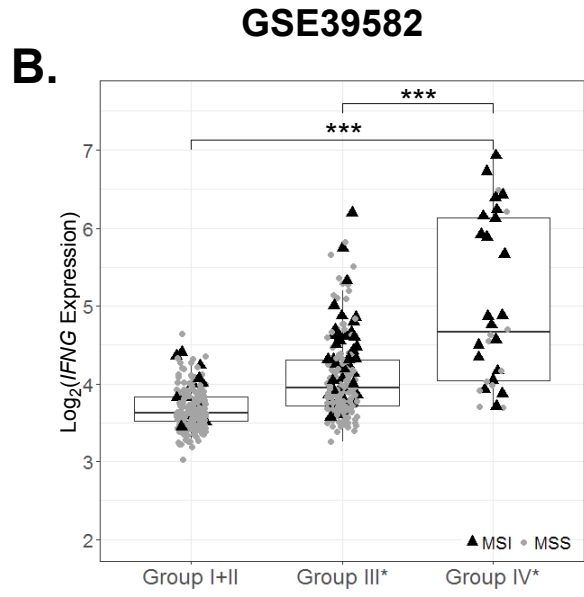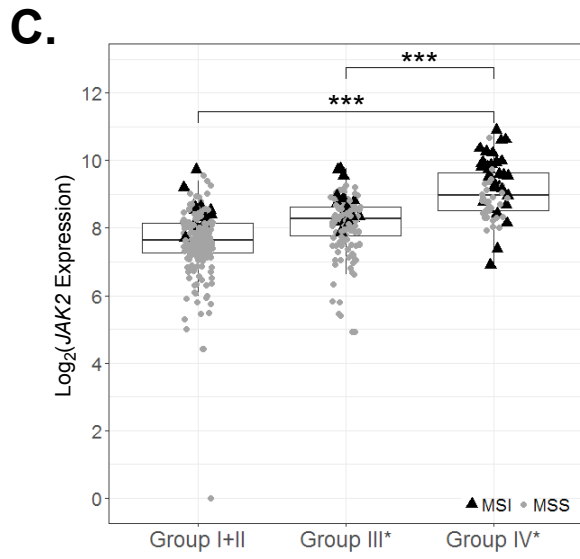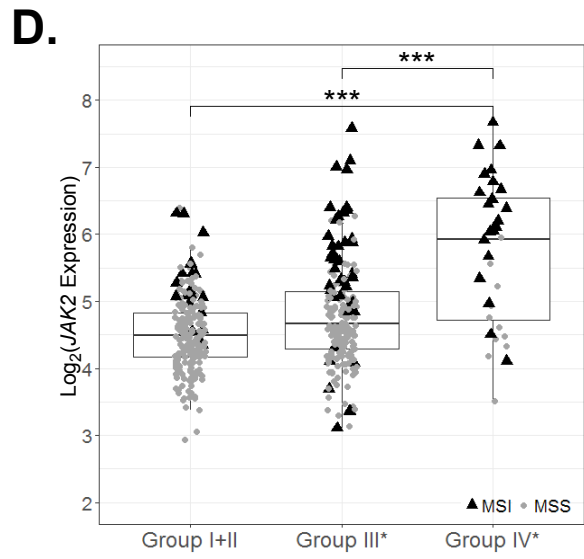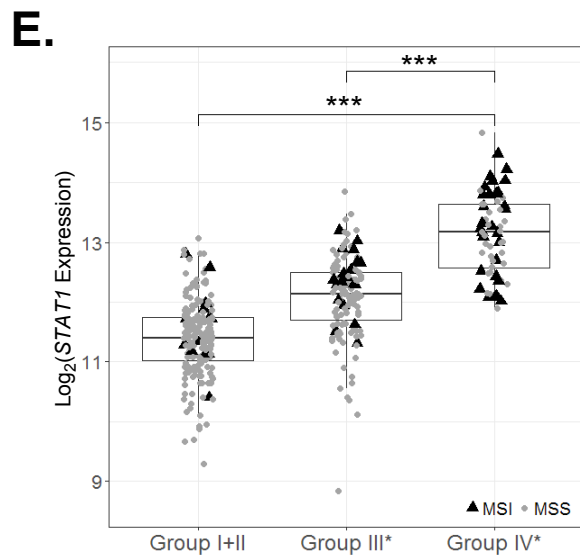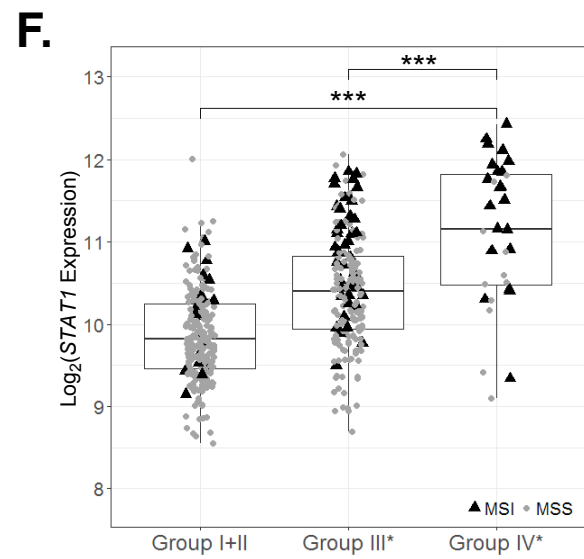

Supplemental Figure S8 A-F

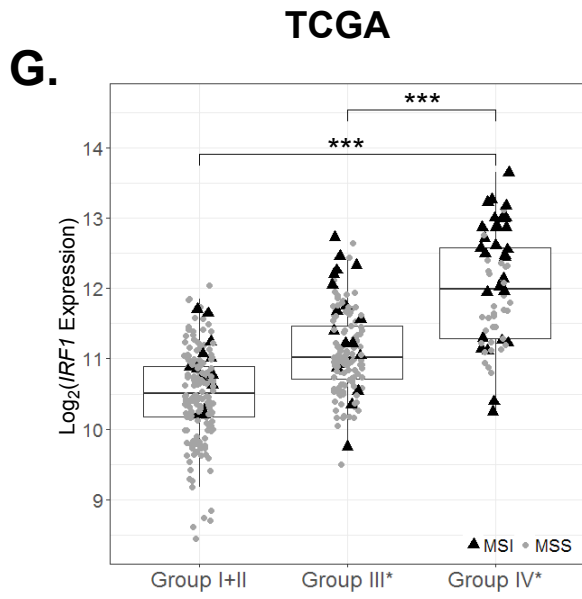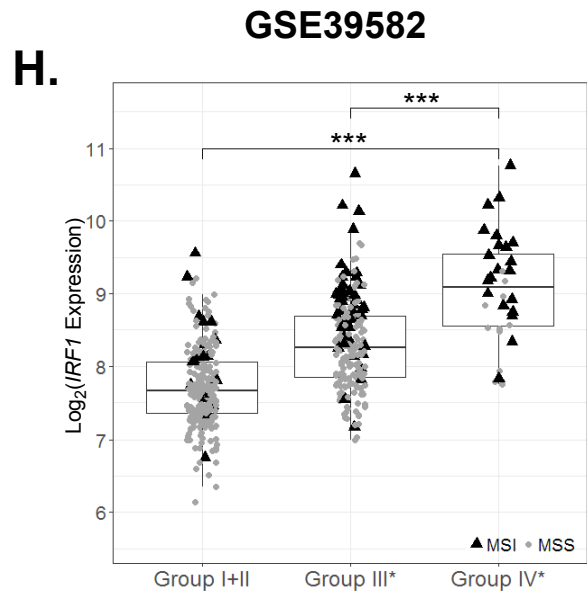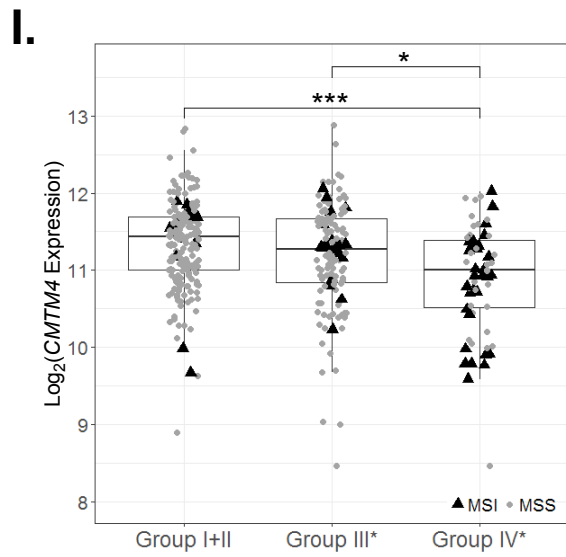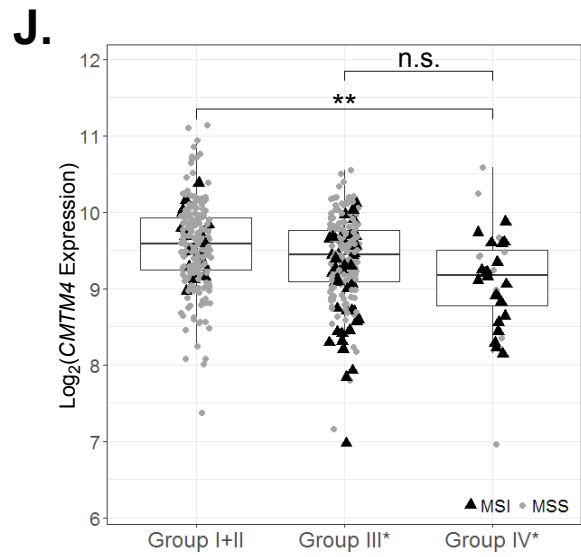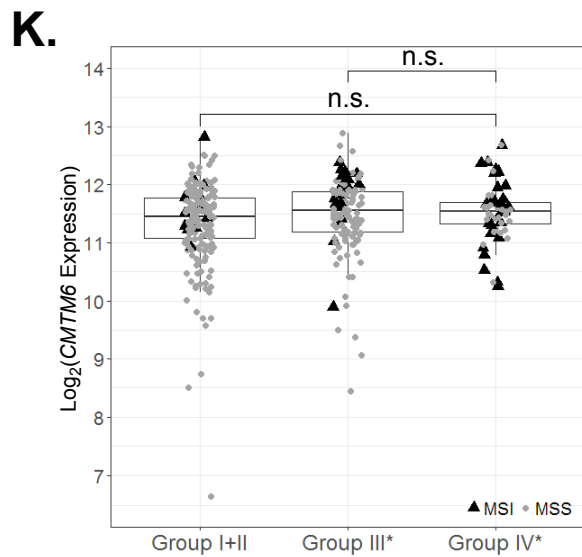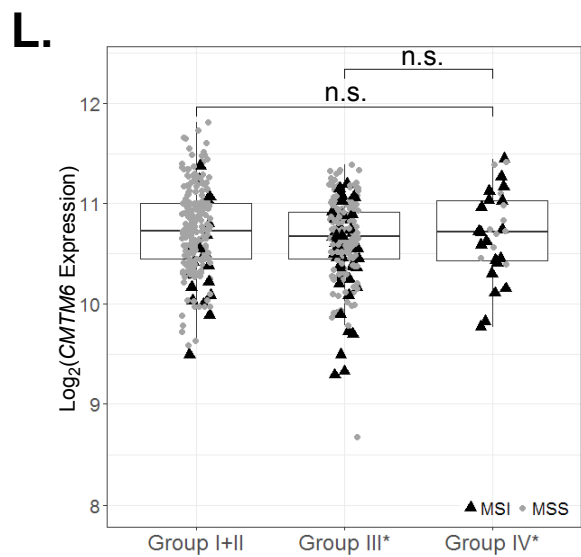

**Supplemental Figure S8.** The expression of CD274 (PD-L1) regulatory genes across the CRC risk groups.

Standard boxplots are applied to visualize the gene expression across the three risk groups following the convention in Figure 5, with data derived from TCGA and NCBI-GEO GSE39582 plotted to the left and right panels, respectively. The CD274 (PD-L1) regulatory genes exemplified in the presentation include *IFNG* (panel A and B), *JAK2* (panel C and D), *STAT1* (panel E and F), *IRF1* (panel G and H), *CMTM4* (panel I and J), *CMTM6* (panel K and L). Statistical  $p$ -values between groups were determined by Welch's t-tests after Bonferroni correction for multiple comparisons: \*\*\* $p < 0.001$ , \*\* $p < 0.01$ , \* $p < 0.05$ , n.s.: not significant.



**A.**

**TCGA Melanoma**

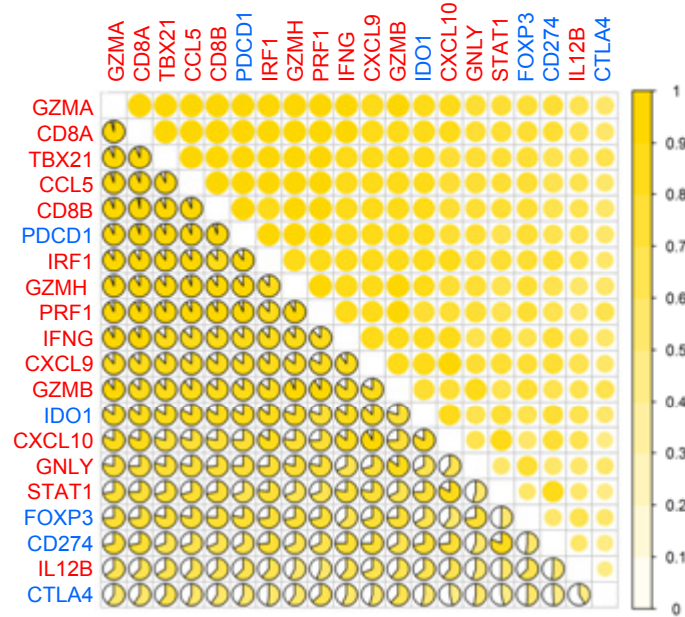

**B.**

**TCGA Colorectal Cancer**

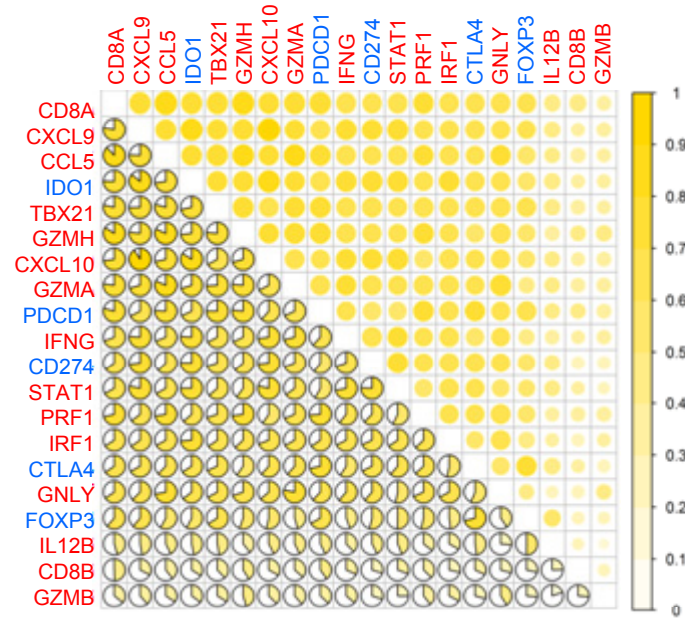

C.

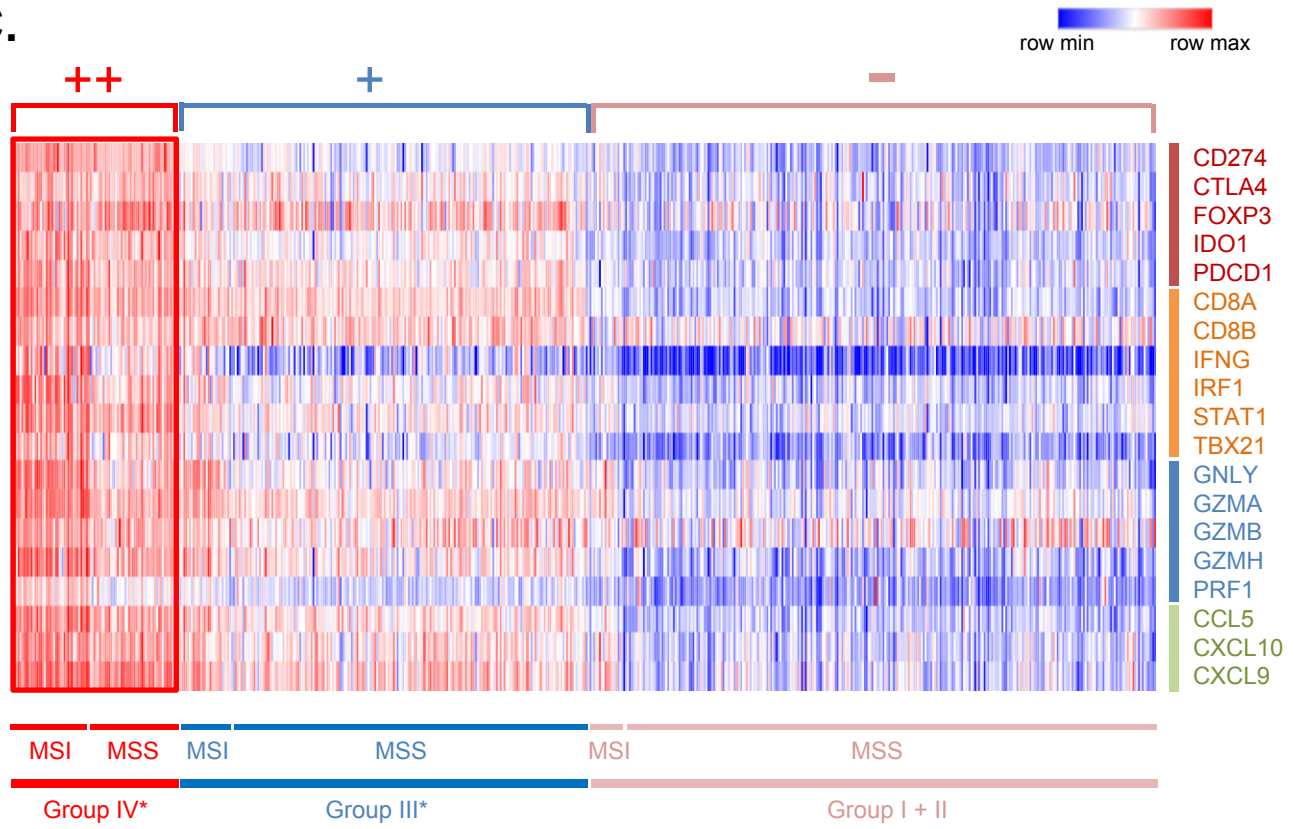

D.

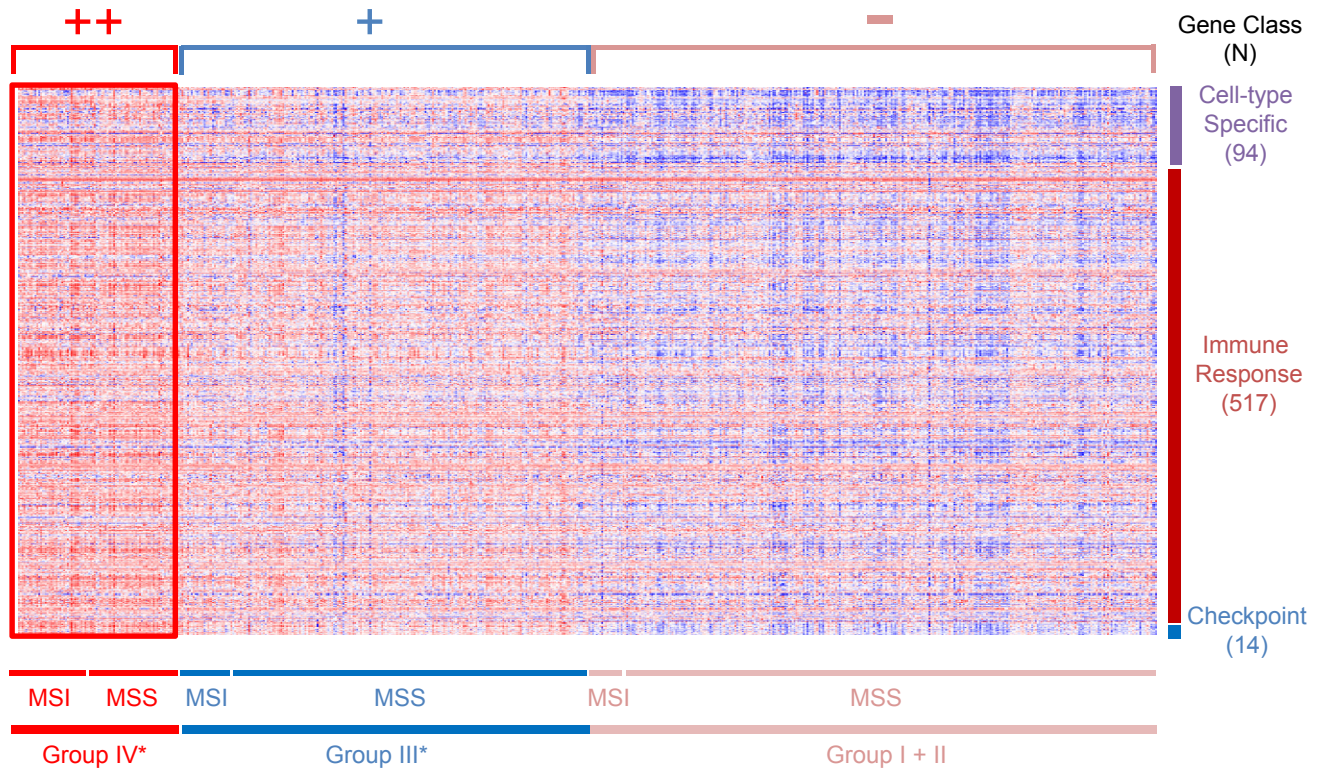

**Supplemental Figure S9.** Correlation among the expression of pro-inflammatory and immune regulatory genes in human melanoma and CRC in TCGA data set, along with the expression pattern of immune genes across the CRC risk groups.

Spearman's correlations among twenty genes displaying an active Th-1 phenotype are graphically visualized in (A) and (B) for melanoma and CRC. Pro-inflammatory genes and immune regulatory genes are typed red and blue. The Spearman's correlations are represented by the combination of color gradient, size of the circles (upper triangle) and area of yellow wedges (lower triangle).

The gene expression of the Th-1 response genes is also visualized using a heat map across the CRC risk groups in (C). Genes functionally representing the counter-activation of immune suppression, Th-1 signaling, effector functions and CXCR3/CCR5 chemokines are typed red, orange, blue and green to the right. The risk groups stratified by *CD8A* and *PD-L1* expression and the MSI status are delineated at the bottom. The overall expression levels are qualitatively shown with ++, + and – for the three risk groups. In addition, the gene expression of an expanded immune gene panel is shown in (D). Genes grouped by functional annotation as cell-type specific, immune response and immune checkpoint are typed purple, red and blue with the number of annotated genes shown to the right.

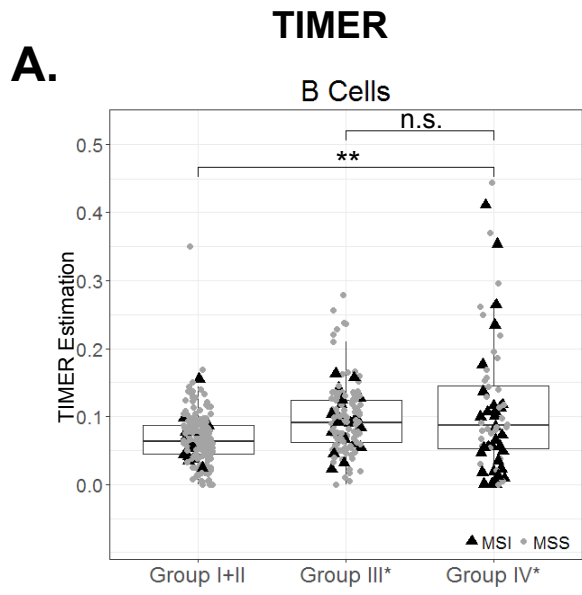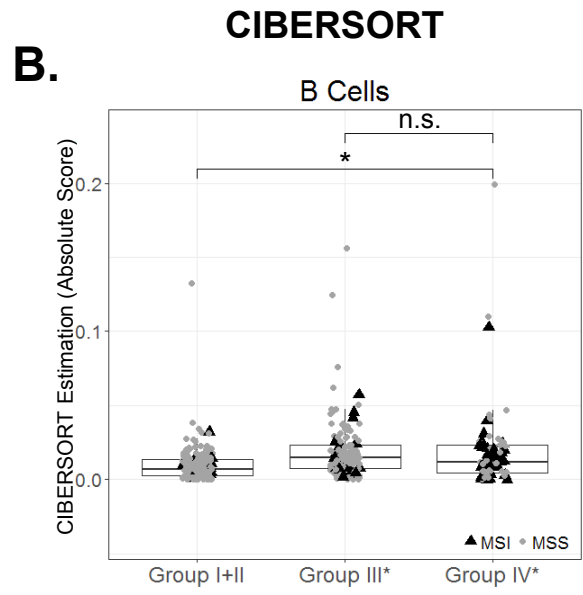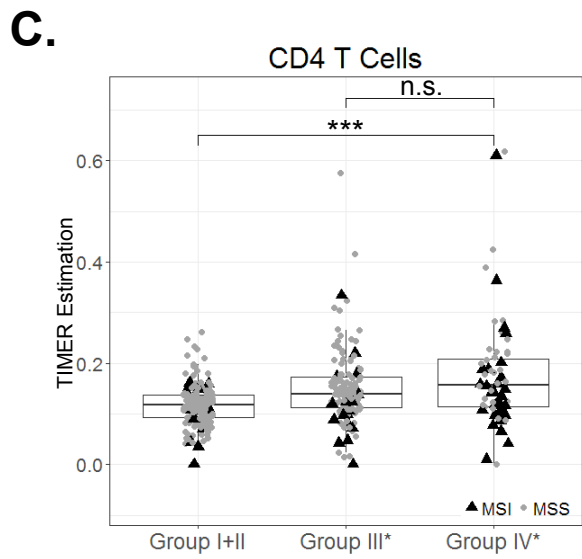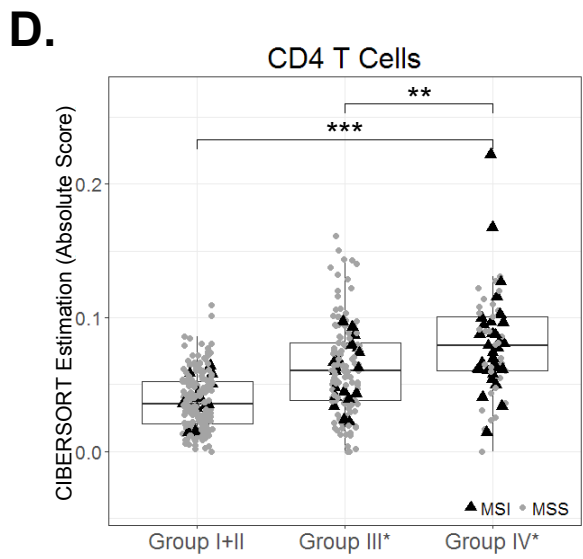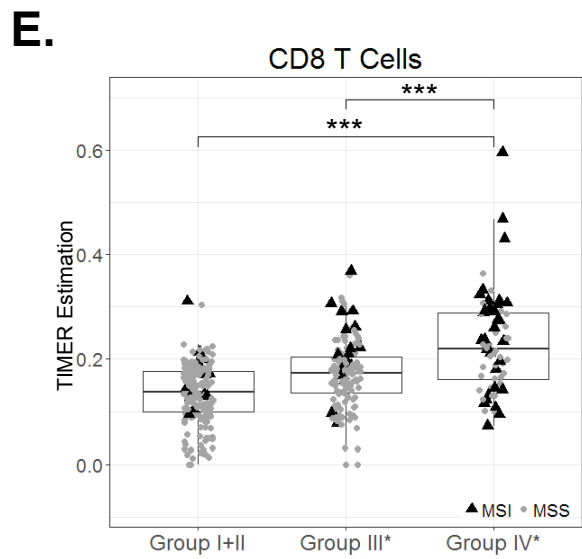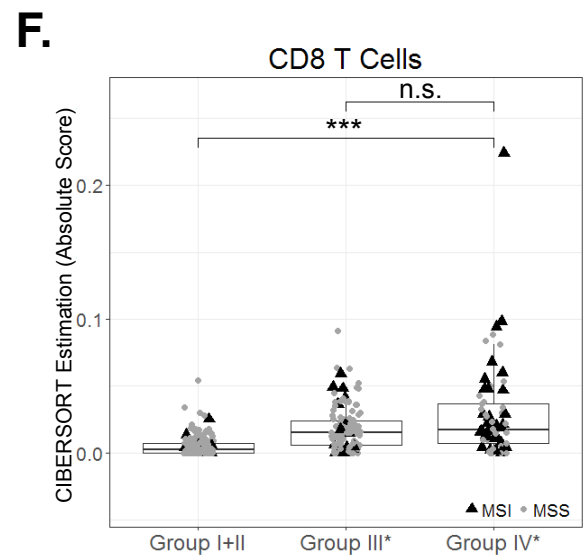

Supplemental Figure S10 A-F

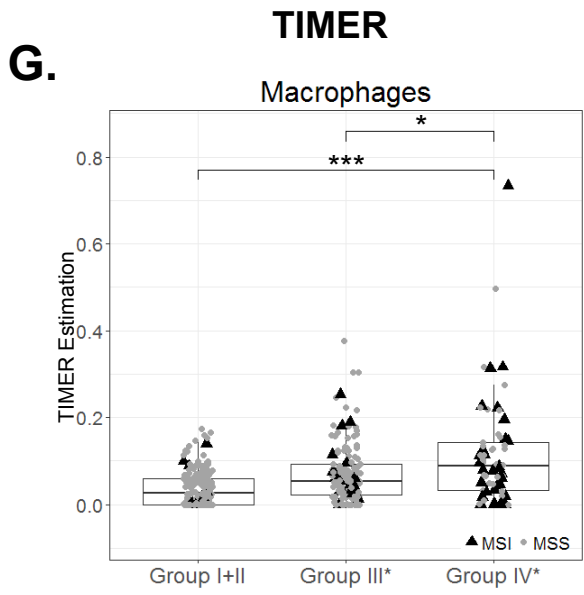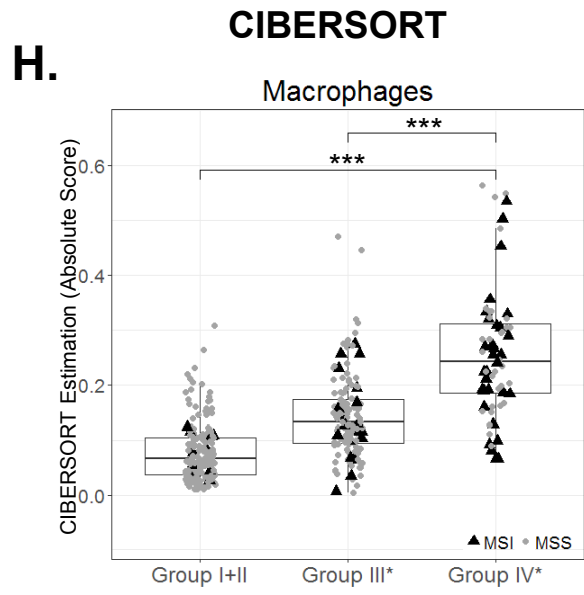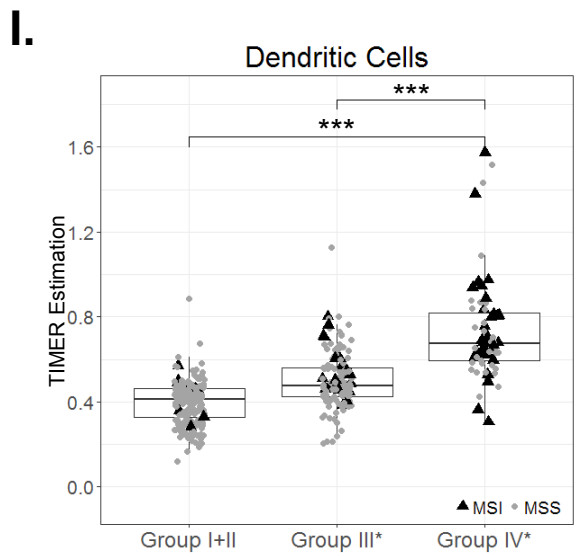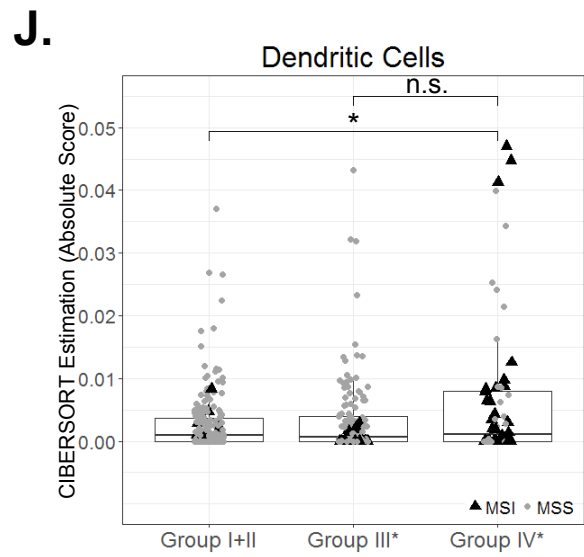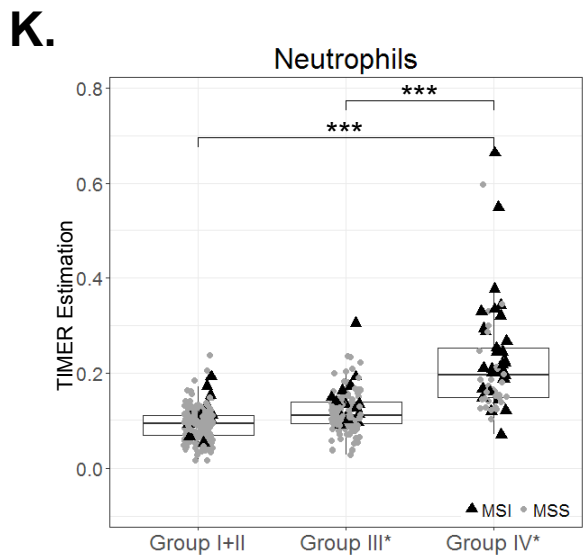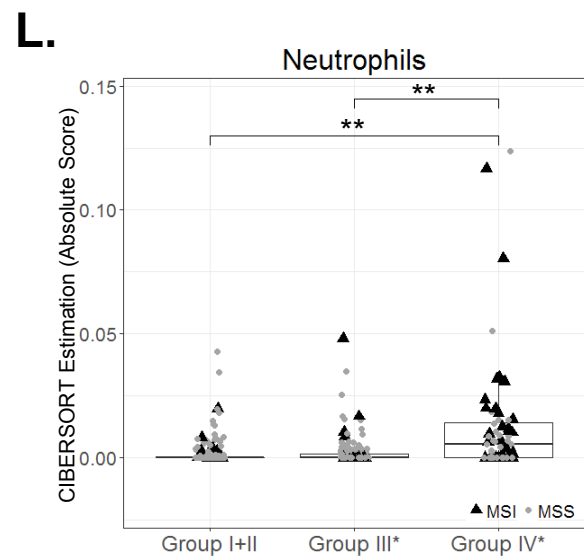

**Supplemental Figure S10.** Estimation of the immune cell infiltration across the *CD8A* and *CD274* (PD-L1) expression-stratified CRC risk groups using two tumor deconvolution methods TIMER and CIBERSORT with TCGA gene expression data.

Standard boxplots are applied to visualize the immune cell infiltration across the three risk groups. The estimates by TIMER and CIBERSORT are plotted to the left and right panels, respectively. Major immune cell types, including B cells (panel A and B), CD4+ T cells (panel C and D), CD8+ T cells (panel E and F), macrophages (panel G and H), dendritic cells (panel I and J) and neutrophils (panel K and L), are presented. For CIBERSORT, which provided estimates for 22 immune cell types), related sub-types were grouped for the presentation. Statistical *p*-values between groups were determined by Welch's t-tests after Bonferroni correction for multiple comparisons: \*\*\**p*<0.001, \*\**p*<0.01, \**p*<0.05, n.s.: not significant.



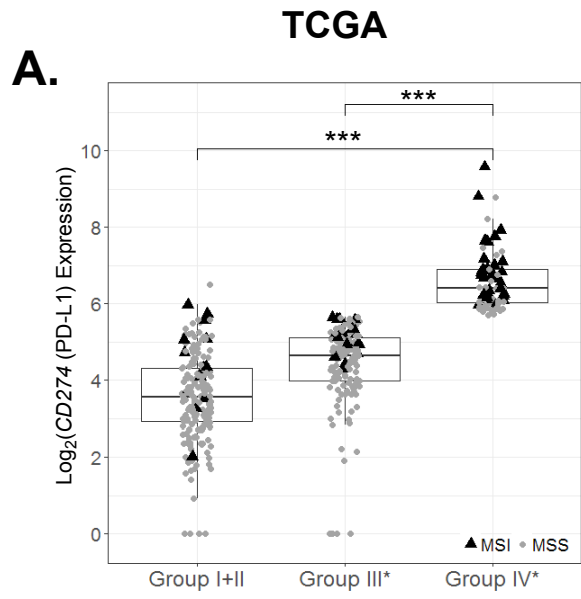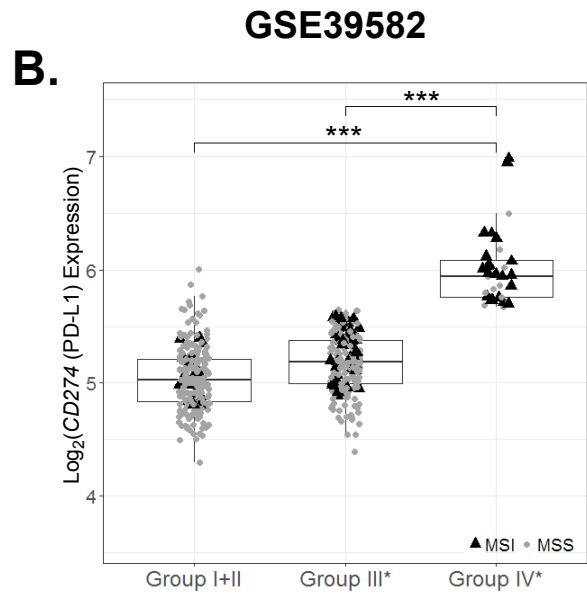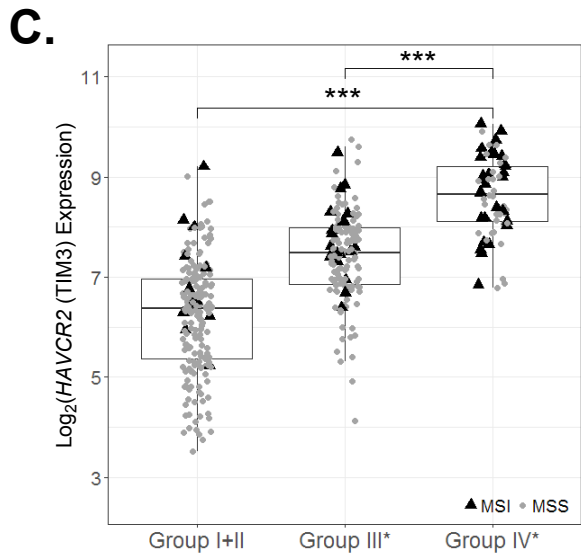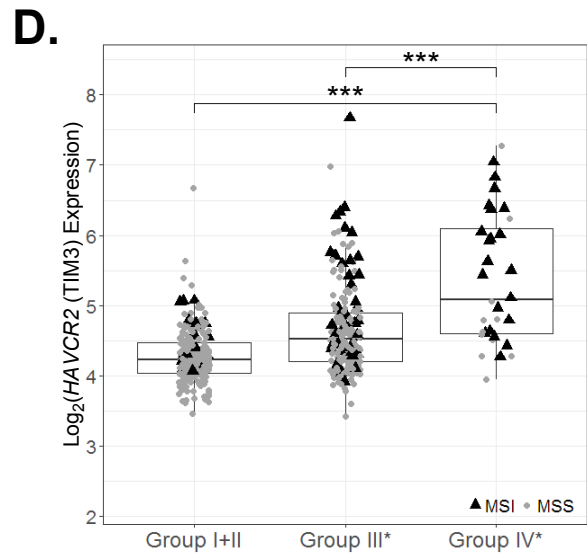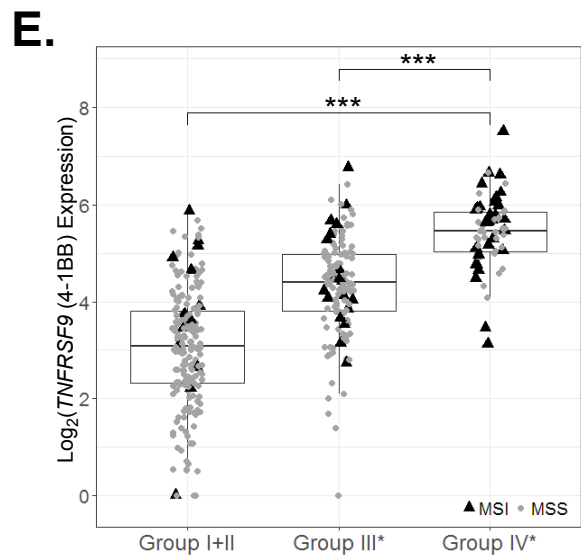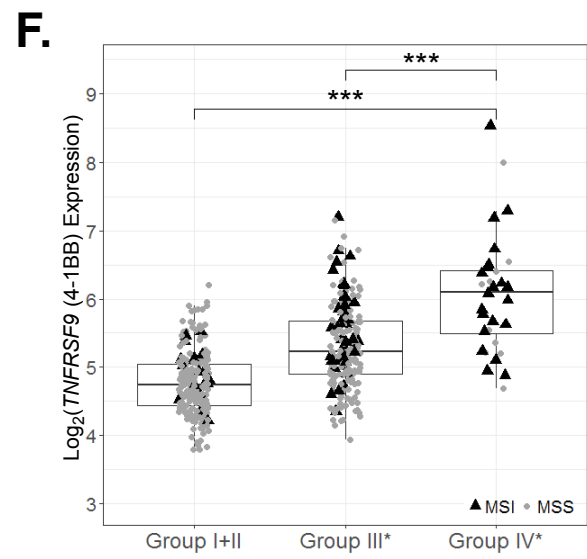

Supplemental Figure S11 A-F

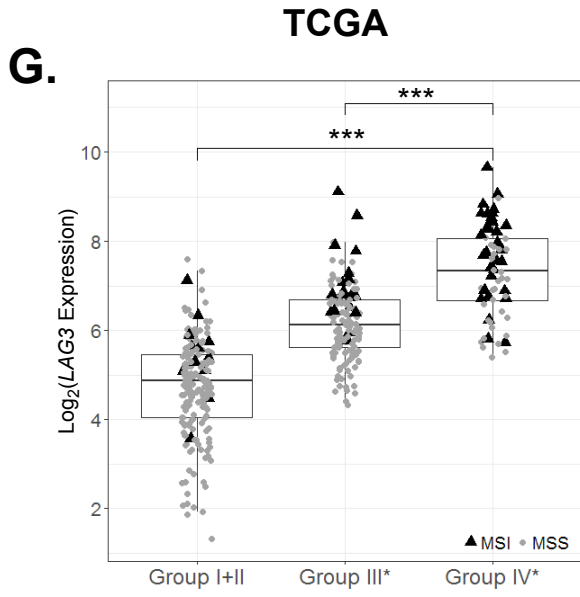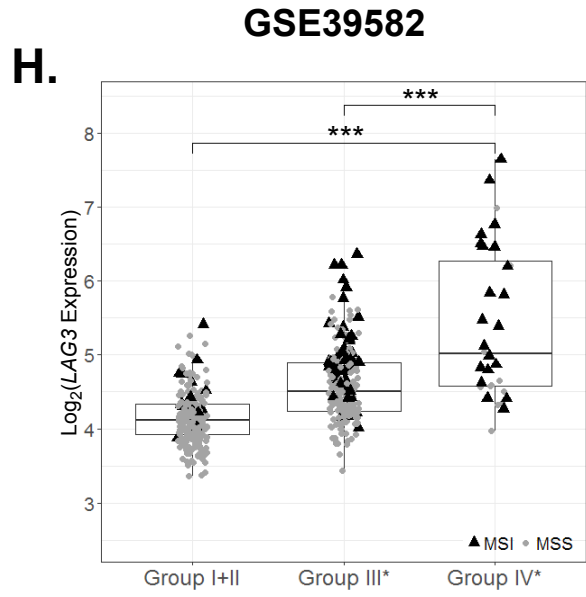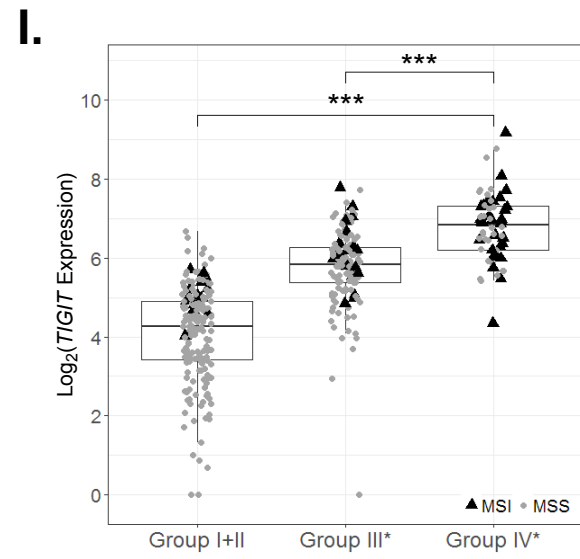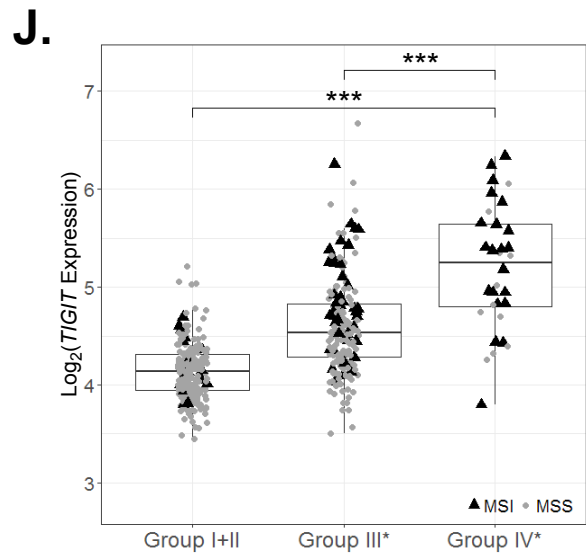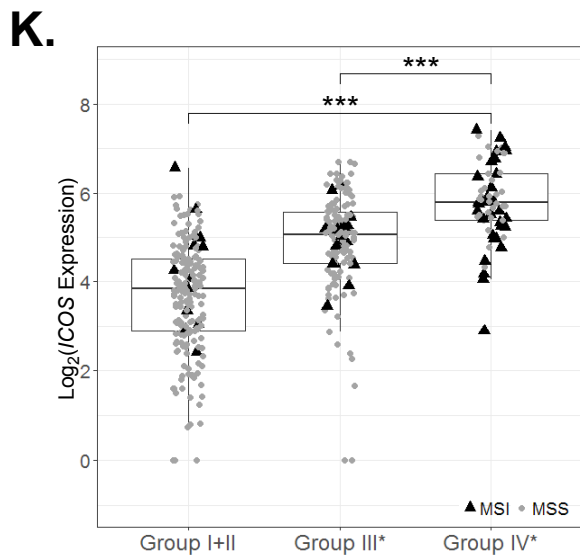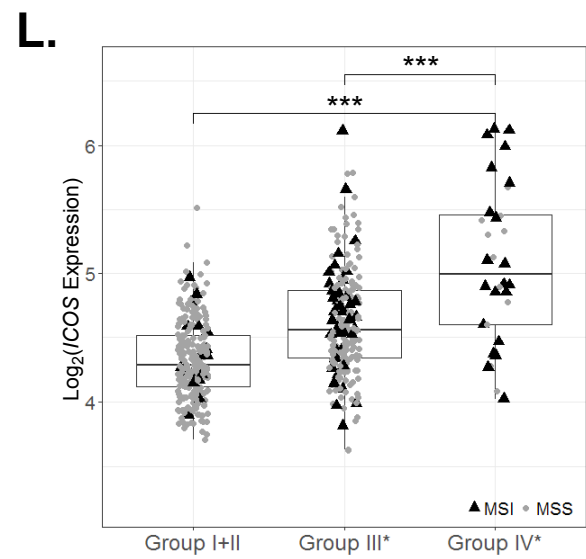

Supplemental Figure S11 G-L



**Supplemental Figure S11.** The expression of representative immune checkpoint genes across the CRC risk groups.

Standard boxplots are applied to visualize the gene expression across the three risk groups following the convention in Figure 5, with data derived from TCGA and NCBI-GEO GSE39582 plotted to the left and right panels, respectively. The immune checkpoint genes exemplified in the presentation include *CD274* (PD-L1; panel A and B), *HAVCR2* (TIM-3; panel C and D), *TNFRSF9* (4-1BB or CD137; panel E and F), *LAG3* (panel G and H), *TIGIT* (panel I and J), *ICOS* (panel K and L). Statistical *p*-values between groups were determined by Welch's t-tests after Bonferroni correction for multiple comparisons: \*\*\* $p < 0.001$ , \*\* $p < 0.01$ , \* $p < 0.05$ , n.s.: not significant.

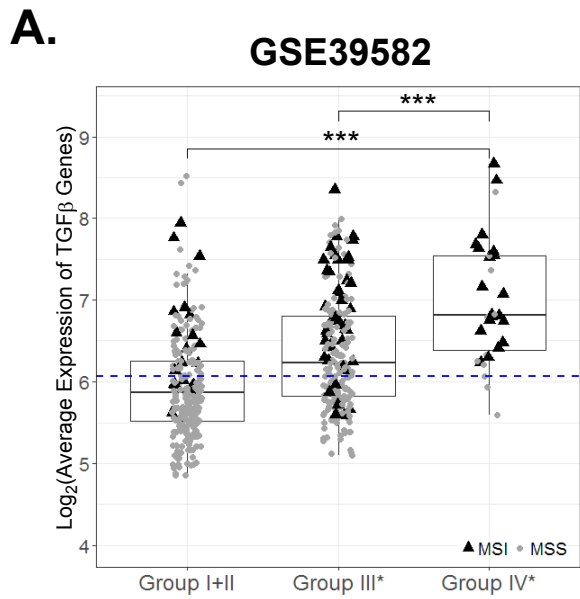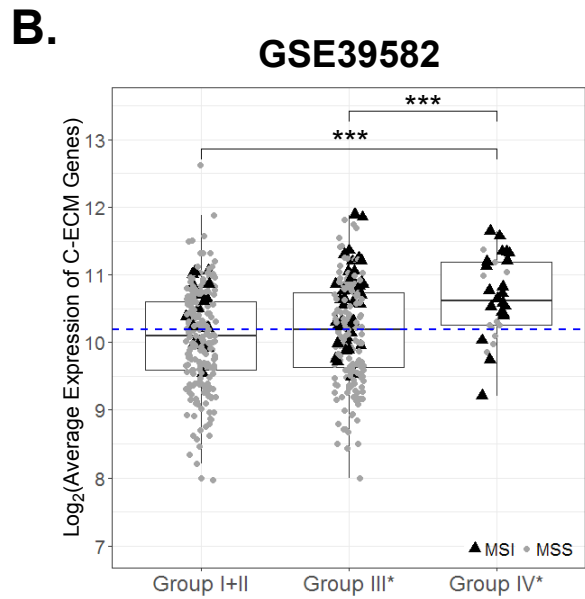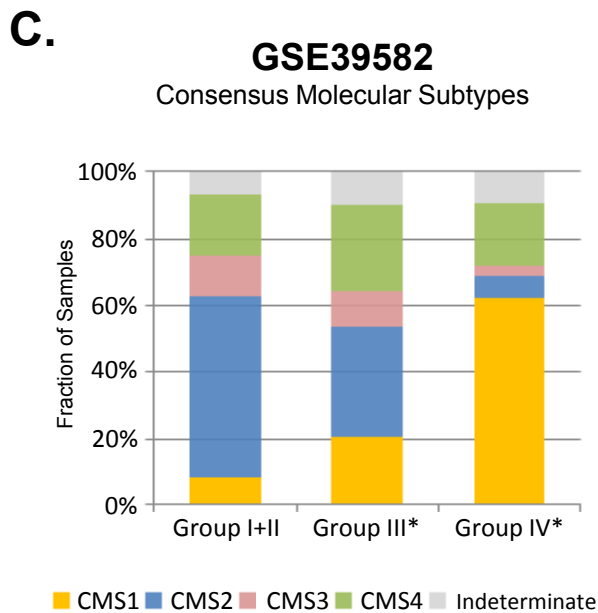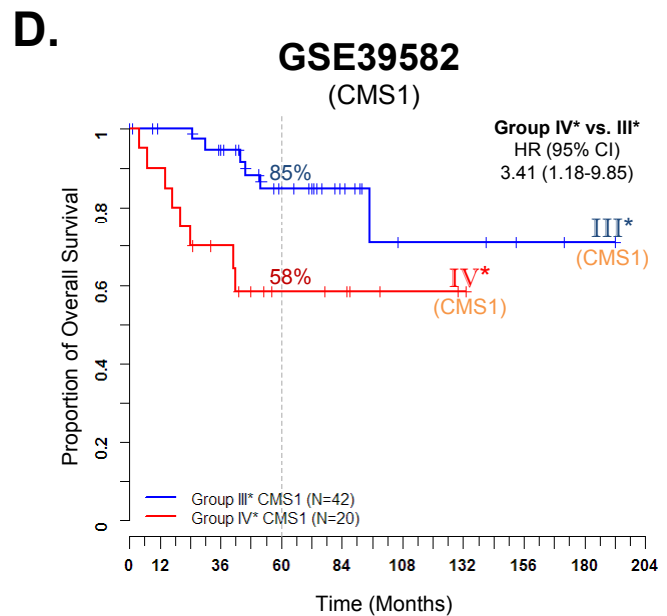

**Supplemental Figure S12.** Expression of TGF $\beta$ -encoding and C-ECM signature genes and the distribution of consensus molecular subtypes (CMS) across the CRC risk groups in NCBI-GEO GSE39582 stage II and III samples.

Following the convention in Figure 6 except using NCBI-GEO GSE39582 data set.

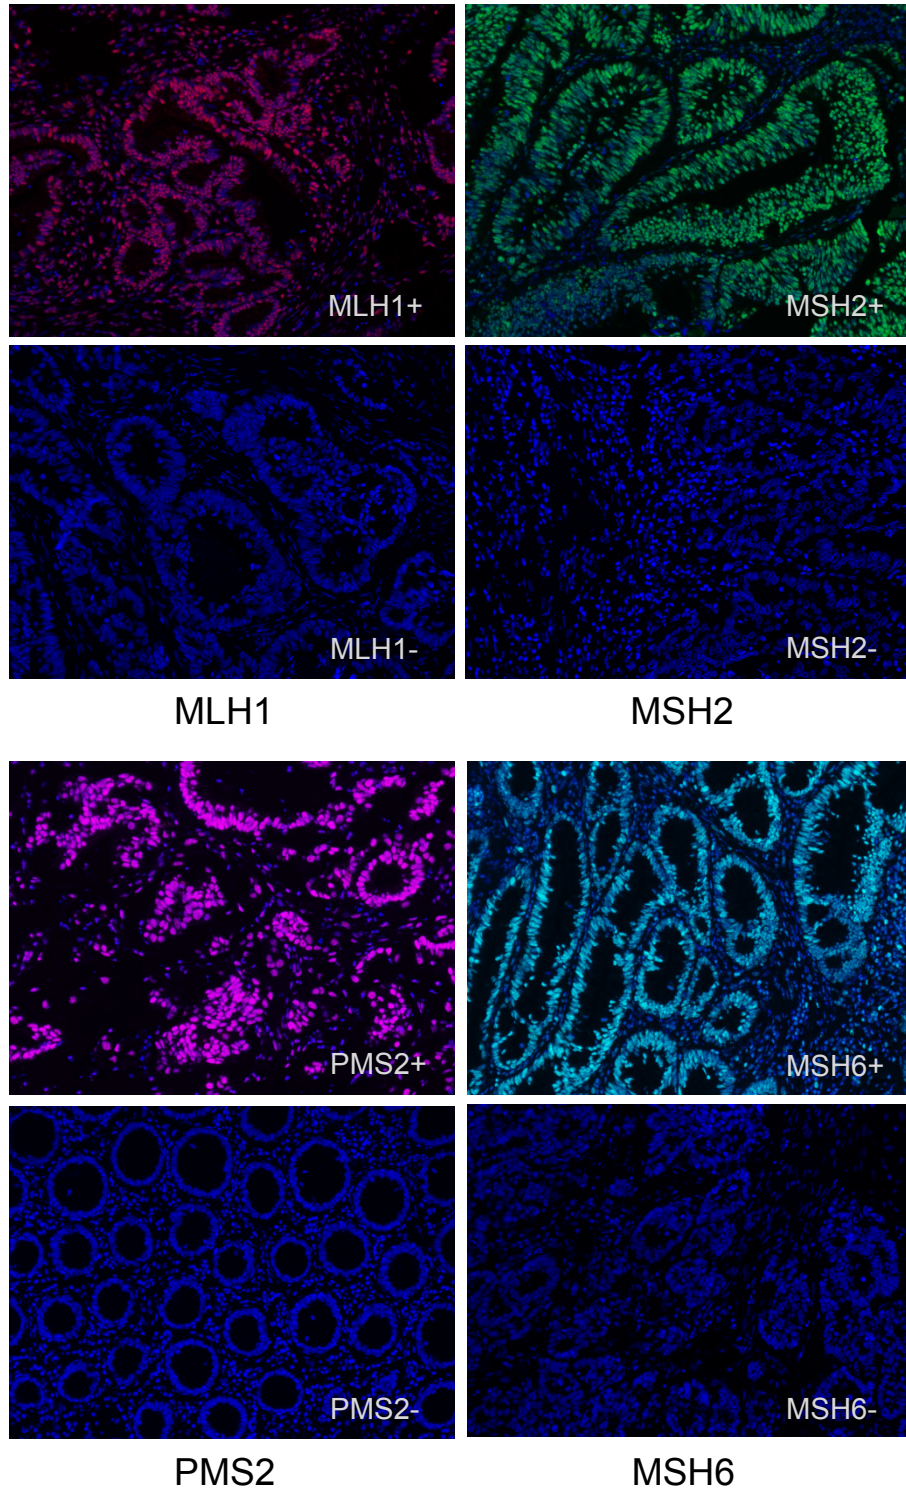

■ MLH1   
 ■ MSH2   
 ■ PMS2   
 ■ MSH6   
 ■ DAPI

Supplemental Figure S13

**Supplemental Figure S13.** Multispectral fluorescent IHC staining of the protein products of DNA mismatch-repair genes (City of Hope cohort).

Seventy-one colorectal cancer tissue specimens from City of Hope Comprehensive Cancer Center were analyzed for their status of MMRD or MMRP based on the protein expression of MLH1 (top left), MSH2 (top right), PMS2 (bottom left) and MSH6 (bottom right). MMRD is based on a complete absence of nuclear staining of at least one MMR protein (exemplified on bottom panel for each protein). MMRP is defined as the presence of nuclear staining of all four MMR proteins in tumor nuclei (exemplified on top panel for each gene). Color combination: MLH1 (Red), MSH6 (Cyan), MSH2 (Green), PMS2 (Magenta), DAPI (blue).

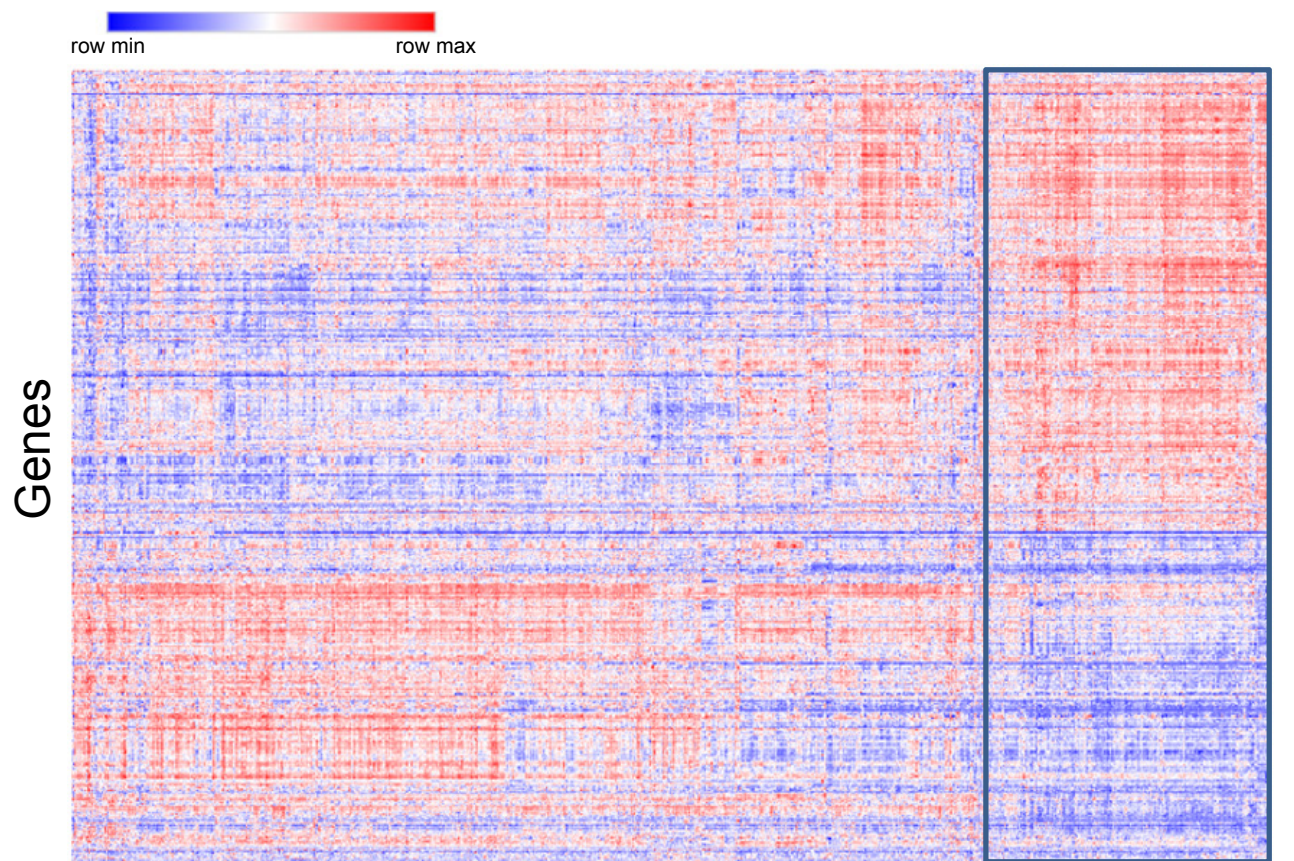

Samples

MSI cluster

72/78 known MSI control samples  
161/828 (19.4%) meta-analysis samples

**Supplemental Figure S14.** Inference of microsatellite instability using microarray gene expression profiles in a NCBI-GEO data meta-analysis for stage II and III samples.

For the 828 meta-analysis samples in NCBI-GEO meta-analysis data set, a panel of 543 signature genes, known for their differential expression between MSI and MSS samples, was applied for the determination of MSI status. Hierarchical clustering, including additional 155 samples having pre-determined MSI/MSS status, was conducted and the result was visualized using a heat map. Each column represents a sample and each row represents a gene. The expression level of a given gene for a sample was indicated by a color scheme (top left). Red color indicates higher expression and blue color indicates lower expression relative to the mean expression value of a given gene across all samples. Samples showing similar gene expression profiles are being clustered together. The resulting MSI cluster covered 72 of 78 known MSI samples and 161 of 828 meta-analysis samples.
